# Supplementary material for: Isotopes illustrate vertical transport of anthropogenic Pb by reversible scavenging within Pacific Ocean particle veils
Source: PubMed Central journal article supplement — Proc Natl Acad Sci U S A. 2023 May 30;120(23):e2219688120. doi: 10.1073/pnas.2219688120 (PMC10265975; doi:10.1073/pnas.2219688120), 2023-05-30
Supplement: pnas.2219688120.sapp.pdf [file pnas.2219688120.sapp.pdf]

# 1 SI Appendix

2023-0403 Supp Fig 1.jpg

4/6/23, 4:48 PM

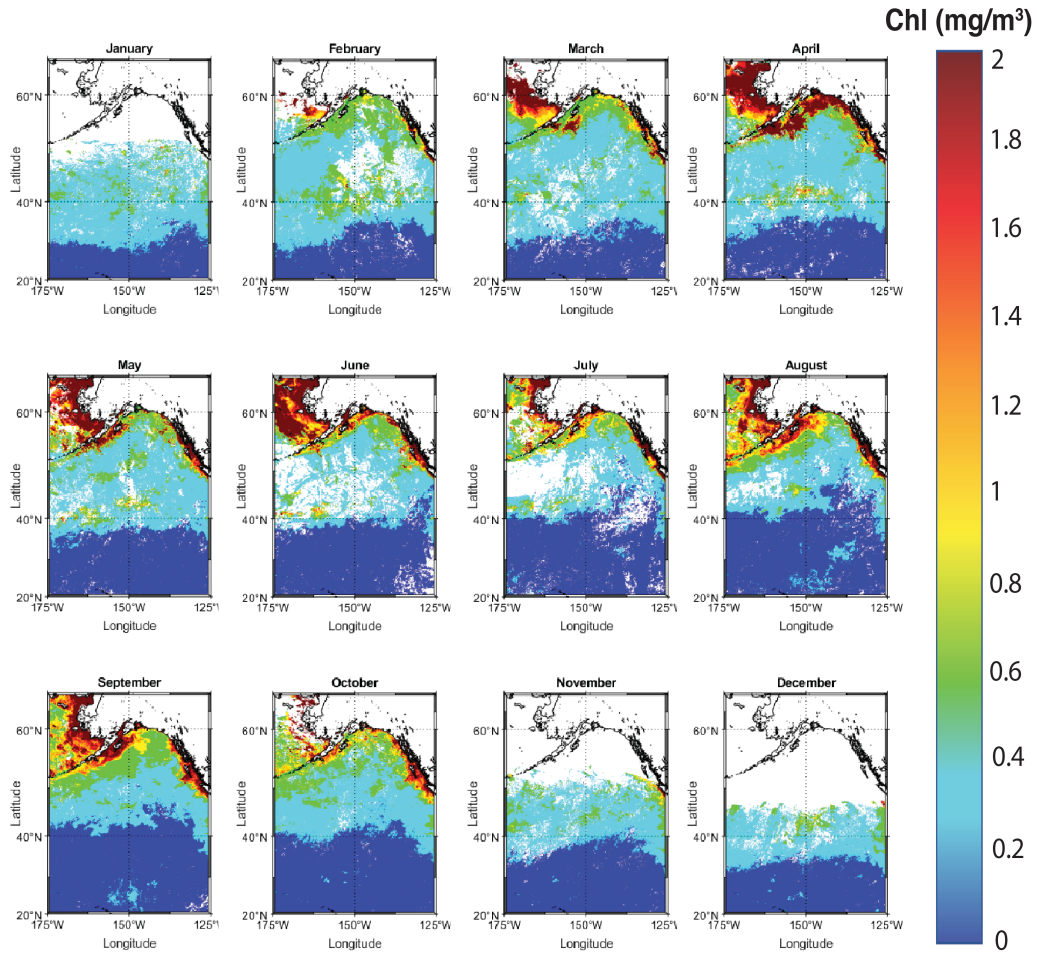

<https://drive.google.com/file/d/1PKJVcsCh8peoliMxC6xdyetMxO9hj69w/view>

Page 1 of 1

2  
3 SI Appendix Figure S1. Surface chlorophyll data from the NASA Aqua MODIS satellite for all  
4 months in 2018, showing the seasonal migration of the Transition Zone Chlorophyll Front  
5 (TZCF).

| <b>Symbol</b>                                     | <b>Description</b>                                                                                                                                |
|---------------------------------------------------|---------------------------------------------------------------------------------------------------------------------------------------------------|
| <b>S</b>                                          | estimated particle Sinking rate ( $\text{m sec}^{-1}$ )                                                                                           |
| <b><math>K_H</math></b>                           | Horizontal eddy diffusion                                                                                                                         |
| <b><math>[\text{dPb}]_{1000}</math></b>           | dissolved lead concentration at the top of the veil box ( $\text{pmol m}^{-3}$ )                                                                  |
| <b><math>[\text{pPb}]_{1000}</math></b>           | particulate lead concentration at the top of the veil box ( $\text{pmol m}^{-3}$ )                                                                |
| <b><math>P_{\text{tot}}</math></b>                | total particulate concentration at the top of the veil box ( $\text{g m}^{-3}$ )                                                                  |
| <b>w</b>                                          | width of the box (latitudinal) (m)                                                                                                                |
| <b>l</b>                                          | length of the box (longitudinal) (m)                                                                                                              |
| <b>h</b>                                          | height of the box (vertical) (m)                                                                                                                  |
| <b><math>[\text{dPb}]_{\text{outside}}</math></b> | dissolved Pb concentration in the deep ocean outside of the veil box ( $\text{pmol m}^{-3}$ )                                                     |
| <b><math>K_D</math></b>                           | dimensionless adsorption distribution coefficient of dissolved and particulate Pb (pmol Pb per gram of particulates/pmol Pb per gram of solution) |
| <b><math>[\text{dPb}]</math></b>                  | dissolved Pb concentration within the bottom of the veil box ( $\text{pmol kg}^{-1}$ )                                                            |
| <b><math>[\text{pPb}]</math></b>                  | particulate Pb concentration within the bottom of the veil box ( $\text{pmol kg}^{-1}$ )                                                          |

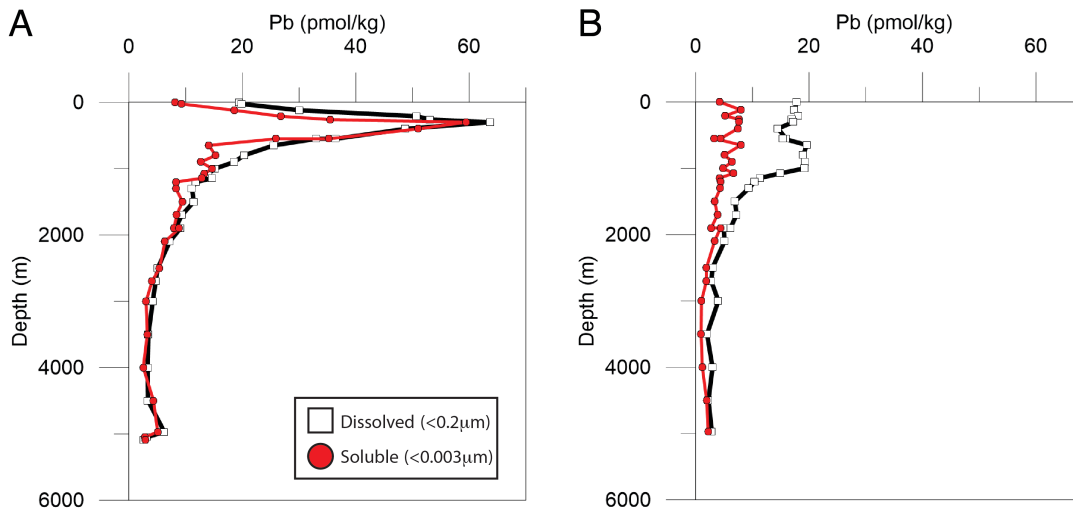

9

10 SI Appendix Figure S2. Depth profiles of dissolved (<math><0.2\mu\text{m}</math>; squares) and soluble  
11 (<math><0.003\mu\text{m}</math>~10kDa; circles) Pb concentrations at GEOTRACES GP15 station 19 (A) outside of a  
12 particle veil and station 29 (B) at the Equatorial particle veil.

13

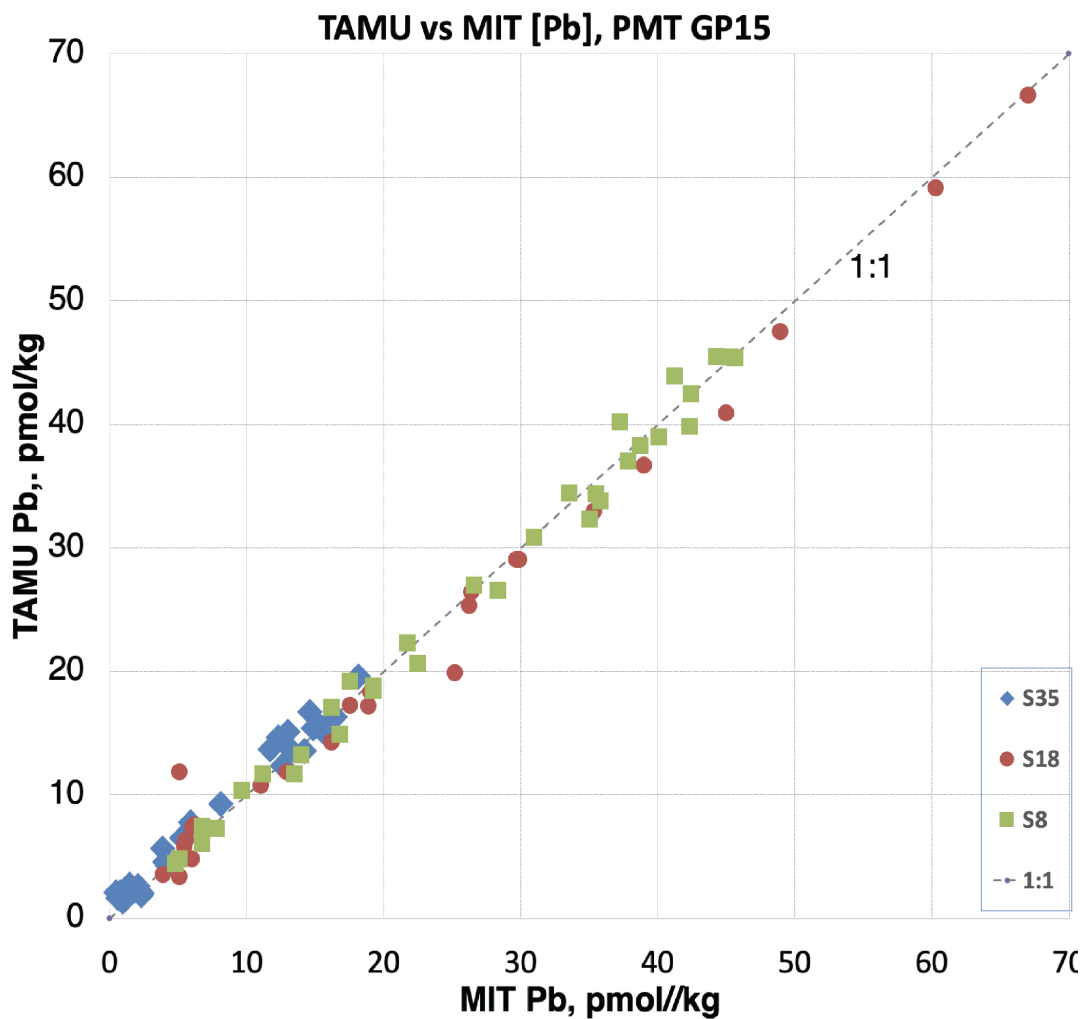

15  
 16 SI Appendix Figure S3. Comparison of dissolved Pb (dPb) concentrations measured at TAMU  
 17 and MIT from GP15 Station 8 in green (S8), Station 18 in red (S18), and Station 35 in blue (S35).  
 18 These are the only stations shown because dPb was only measured at MIT at those three stations  
 19 for intercomparison.

## Data

| GP15   |           |                |             |           |              |          |               | Small Particulate |               |        | Small Particulate |           |
|--------|-----------|----------------|-------------|-----------|--------------|----------|---------------|-------------------|---------------|--------|-------------------|-----------|
| Statio | GT#       | GT#            |             | Longitude | Dissolved Pb |          | Leachable SPM | Total PIC         | Leachable pPb |        |                   |           |
| n      | GT# (dPb) | (dPb Isotopes) | (Particles) | Depth (m) | Latitude (N) | (W)      | (pmol/kg)     | 206Pb/207Pb       | 208Pb/206Pb   | (ug/L) | (nmol/kg)         | (pmol/kg) |
| 1      | 12430     | 12430          |             | 0         | 56           | 156.9622 | 3.356         | 1.1524            | 2.1688        |        |                   |           |
| 1      | 12441     | 12442          | 12451       | 20        | 56           | 156.9622 | 3.412         | 1.1856            | 2.0672        | 235.99 | 8.61              |           |
| 1      | 12439     |                |             | 30        | 56           | 156.9622 | 11.661        |                   |               |        |                   |           |
| 1      | 12437     | 12438          | 12452       | 40        | 56           | 156.9622 | 3.824         | 1.1887            | 2.0613        | 81.24  | 27.04             | 5.51      |
| 1      | 12435     | 12436          |             | 50        | 56           | 156.9622 | 5.254         | 1.1694            | 2.1248        |        |                   |           |
| 1      | 12433     | 12434          | 12453       | 70        | 56           | 156.9622 | 4.434         | 1.1737            | 2.1246        | 74.58  | 27.49             | 6.16      |
| 1      | 12431     | 12432          | 12454       | 85        | 56           | 156.9622 | 4.851         | 1.1752            | 2.1196        | 109.99 | 32.91             | 6.68      |
| 2      | 12455     | 12455          |             | 0         | 56           | 156.3473 | 8.174         | 1.17              | 2.0936        |        |                   |           |
| 2      | 12469     | 12470          |             | 44        | 56           | 156.3473 | 12.795        | 1.1737            | 2.0897        |        |                   |           |
| 2      | 12467     | 12468          |             | 65        | 56           | 156.3473 | 16.218        | 1.1654            | 2.1027        |        |                   |           |
| 2      | 12465     |                |             | 100       | 56           | 156.3473 | 22.181        |                   |               |        |                   |           |
| 2      | 12463     | 12464          |             | 150       | 56           | 156.3473 | 30.58         | 1.1671            | 2.0987        |        |                   |           |
| 2      | 12461     | 12462          |             | 190       | 56           | 156.3473 | 32.534        | 1.1799            | 2.082         |        |                   |           |
| 2      | 12459     | 12460          |             | 225       | 56           | 156.3473 | 32.404        | 1.1823            | 2.0789        |        |                   |           |
| 2      | 12457     | 12458          |             | 250       | 56           | 156.3473 | 27.599        | 1.1799            | 2.0822        |        |                   |           |
| 3      | 12556     | 12556          |             | 0         | 55           | 155.7202 | 16.615        | 1.1658            | 2.0991        |        |                   |           |
| 3      | 12508     | 12509          | 12523       | 30        | 55           | 155.7202 | 18.892        | 1.1599            | 2.1088        | 80.87  | 160.11            | 0.5       |
| 3      | 12506     | 12507          |             | 60        | 55           | 155.7202 | 23.985        | 1.1591            | 2.1151        |        |                   |           |
| 3      | 12504     | 12505          | 12524       | 100       | 55           | 155.7202 | 24.892        | 1.1602            | 2.1054        | 20.79  | 31.38             | 0.7       |
| 3      | 12502     | 12503          |             | 175       | 55           | 155.7202 | 40.661        | 1.161             | 2.1089        |        |                   |           |
| 3      | 12500     | 12501          | 12525       | 300       | 55           | 155.7202 | 43.122        | 1.1617            | 2.1085        | 13.06  | 29.65             | 0.22      |
| 3      | 12498     |                | 12526       | 500       | 55           | 155.7202 | 42.093        |                   |               | 9.16   | 26.82             | 0.25      |
| 3      | 12496     | 12497          |             | 700       | 55           | 155.7202 | 29.884        | 1.1642            | 2.1015        |        |                   |           |
| 3      | 12494     | 12495          | 12527       | 800       | 55           | 155.7202 | 37.552        | 1.1649            | 2.0998        | 6.37   | 23.04             | 0.27      |
| 3      | 12492     | 12493          | 12528       | 1100      | 55           | 155.7202 | 29.884        | 1.1665            | 2.0947        | 6.71   | 14.9              | 0.31      |
| 3      | 12491     | 12491          | 12529       | 1400      | 55           | 155.7202 | 33.376        | 1.1701            | 2.0883        | 7.32   | 18.79             | 0.29      |
| 3      | 12488     | 12489          | 12530       | 1560      | 55           | 155.7202 | 25.865        | 1.171             | 2.0925        | 8.36   | 15.92             | 0.24      |
| 3      | 12486     | 12487          |             | 1595      | 55           | 155.7202 | 24.434        | 1.1703            | 2.0906        |        |                   |           |
| 4      | 12558     | 12558          |             | 0         | 55           | 155.1708 | 15.26         | 1.1673            | 2.0876        |        |                   |           |
| 4      | 12582     | 12583          |             | 20        | 55           | 155.1708 | 17.654        | 1.1661            | 2.0971        |        |                   |           |
| 4      | 12580     |                | 12597       | 30        | 55           | 155.1708 | 16.234        |                   |               | 90.72  | 97.52             | 0.88      |
| 4      | 12578     |                |             | 40        | 55           | 155.1708 | 17.557        |                   |               |        |                   |           |
| 4      | 12576     |                |             | 50        | 55           | 155.1708 | 24.161        |                   |               |        |                   |           |
| 4      | 12574     | 12575          |             | 60        | 55           | 155.1708 | 28.477        | 1.1638            | 2.1026        |        |                   |           |
| 4      | 12572     |                | 12598       | 70        | 55           | 155.1708 | 29.982        |                   |               | 28.17  | 32.62             | 0.53      |
| 4      | 12570     | 12571          | 12599       | 100       | 55           | 155.1708 | 39.168        | 1.163             | 2.1039        | 20.31  | 21.96             | 0.53      |
| 4      | 12568     |                |             | 145       | 55           | 155.1708 | 42.118        |                   |               |        |                   |           |
| 4      | 12566     | 12567          | 12600       | 200       | 55           | 155.1708 | 46.071        | 1.1633            | 2.1038        | 18.34  | 27.61             | 0.31      |
| 4      | 12564     |                |             | 250       | 55           | 155.1708 | 48.396        |                   |               |        |                   |           |
| 4      | 12562     | 12563          |             | 300       | 55           | 155.1708 | 46.511        | 1.1652            | 2.1017        |        |                   |           |
| 4      | 12560     | 12561          | 12601       | 400       | 55           | 155.1708 | 45.726        | 1.1662            | 2.0983        | 10.88  | 22.05             | 0.21      |

|   |       |       |       |      |          |          |        |        |        |        |        |      |
|---|-------|-------|-------|------|----------|----------|--------|--------|--------|--------|--------|------|
| 4 | 12640 |       | 400   | 55   | 155.1708 | 46.168   |        |        |        |        |        |      |
| 4 | 12638 |       | 500   | 55   | 155.1708 | 43.95    |        |        |        |        |        |      |
| 4 | 12636 | 12637 | 600   | 55   | 155.1708 | 41.667   | 1.1643 | 2.1034 |        |        |        |      |
| 4 | 12634 | 12635 | 12602 | 800  | 55       | 155.1708 | 37.792 | 1.1657 | 2.1002 | 10.71  | 21.15  | 0.36 |
| 4 | 12632 | 12633 | 1000  | 55   | 155.1708 | 34.697   | 1.1661 | 2.1008 |        |        |        |      |
| 4 | 12630 | 12631 | 12603 | 1200 | 55       | 155.1708 | 30.562 | 1.1713 | 2.0855 | 8.15   | 16.75  | 0.27 |
| 4 | 12628 | 12629 | 1400  | 55   | 155.1708 | 27.429   | 1.1674 | 2.117  |        |        |        |      |
| 4 | 12626 |       | 12604 | 1600 | 55       | 155.1708 | 23.794 |        |        |        | 14.75  | 0.44 |
| 4 | 12624 |       | 1800  | 55   | 155.1708 | 20.26    |        |        |        |        |        |      |
| 4 | 12622 | 12623 | 12691 | 2000 | 55       | 155.1708 | 18.73  | 1.1777 | 2.0746 | 10.17  | 12.06  | 0.39 |
| 4 | 12620 |       | 2250  | 55   | 155.1708 | 18.384   |        |        |        |        |        |      |
| 4 | 12618 |       | 2500  | 55   | 155.1708 | 14.373   |        |        |        |        |        |      |
| 4 | 12676 |       | 2500  | 55   | 155.1708 | 14.784   |        |        |        |        |        |      |
| 4 | 12674 |       | 12692 | 2750 | 55       | 155.1708 | 10     |        |        | 12.96  | 10.59  | 0.44 |
| 4 | 12672 |       | 3000  | 55   | 155.1708 | 11.964   |        |        |        |        |        |      |
| 4 | 12670 |       | 3250  | 55   | 155.1708 | 10.443   |        |        |        |        |        |      |
| 4 | 12668 | 12669 | 12693 | 3600 | 55       | 155.1708 | 10.828 | 1.1812 | 2.0781 | 6.62   | 9.86   | 0.31 |
| 4 | 12666 |       | 4000  | 55   | 155.1708 | 7.729    |        |        |        |        |        |      |
| 4 | 12664 | 12665 | 12694 | 4500 | 55       | 155.1708 | 6      | 1.1798 | 2.0834 | 9.4    | 7.94   |      |
| 4 | 12662 |       | 12695 | 5000 | 55       | 155.1708 | 5.926  |        |        | 11.88  | 4.37   | 0.69 |
| 4 | 12660 | 12661 | 12696 | 5290 | 55       | 155.1708 | 5.678  | 1.1817 | 2.0788 | 11.31  | 3.53   | 0.88 |
| 4 | 12658 | 12659 | 12697 | 5490 | 55       | 155.1708 | 8.945  | 1.1939 | 2.0493 | 14.49  | 2.55   | 0.64 |
| 4 | 12656 | 12657 | 12698 | 5540 | 55       | 155.1708 | 5.762  | 1.1909 | 2.0708 | 20.31  | 2.76   | 0.76 |
| 4 | 12654 |       | 5570  | 55   | 155.1708 | 4.497    |        |        |        |        |        |      |
| 5 | 12322 |       | 0     | 54   | 153.7965 | 17.101   |        |        |        |        |        |      |
| 5 | 12346 |       | 12361 | 25   | 54       | 153.7965 | 33.762 |        |        | 122.79 | 185.25 | 0.92 |
| 5 | 12344 |       | 12362 | 40   | 54       | 153.7965 | 19.874 |        |        | 83.85  | 233.41 | 0.59 |
| 5 | 12342 |       | 55    | 54   | 153.7965 | 27.667   |        |        |        |        |        |      |
| 5 | 12340 |       | 12363 | 70   | 54       | 153.7965 | 28.105 |        |        | 24.46  | 39.83  | 0.57 |
| 5 | 12338 |       | 12364 | 90   | 54       | 153.7965 | 31.48  |        |        | 14.05  | 27.36  | 0.75 |
| 5 | 12336 |       | 120   | 54   | 153.7965 | 43.073   |        |        |        |        |        |      |
| 5 | 12334 |       | 12365 | 140  | 54       | 153.7965 | 43.492 |        |        |        | 49.09  |      |
| 5 | 12332 |       | 12366 | 300  | 54       | 153.7965 | 49.199 |        |        | 13.04  | 37.98  | 0.22 |
| 5 | 12330 |       | 12367 | 450  | 54       | 153.7965 | 43.242 |        |        | 6.11   | 20.26  | 0.01 |
| 5 | 12328 |       | 600   | 54   | 153.7965 | 42.336   |        |        |        |        |        |      |
| 5 | 12326 |       | 12368 | 800  | 54       | 153.7965 | 35     |        |        | 7.12   | 21.44  | 0.31 |
| 5 | 12324 |       | 12407 | 1000 | 54       | 153.7965 | 35.89  |        |        | 7.14   | 18.26  | 0.48 |
| 5 | 12404 |       | 1000  | 54   | 153.7965 | 32.584   |        |        |        |        |        |      |
| 5 | 12402 |       | 1250  | 54   | 153.7965 | 30.19    |        |        |        |        |        |      |
| 5 | 12400 |       | 12408 | 1500 | 54       | 153.7965 | 24.48  |        |        | 4.84   | 17.5   | 0.24 |
| 5 | 12398 |       | 1750  | 54   | 153.7965 | 21.618   |        |        |        |        |        |      |
| 5 | 12396 |       | 2000  | 54   | 153.7965 | 18.654   |        |        |        |        |        |      |
| 5 | 12394 |       | 12409 | 2500 | 54       | 153.7965 | 15.974 |        |        | 5.17   | 15.69  | 0    |
| 5 | 12392 |       | 3000  | 54   | 153.7965 | 12.892   |        |        |        |        |        |      |
| 5 | 12390 |       | 12410 | 3500 | 54       | 153.7965 | 9.124  |        |        | 5.84   | 8.49   | 0.25 |
| 5 | 12388 |       | 12411 | 4150 | 54       | 153.7965 | 8.265  |        |        | 7.47   | 9.01   | 0.55 |
| 5 | 12386 |       | 12412 | 4350 | 54       | 153.7965 | 7.897  |        |        |        |        |      |

|     |       |       |       |      |    |          |        |        |        |        |        |      |
|-----|-------|-------|-------|------|----|----------|--------|--------|--------|--------|--------|------|
| 5   | 12384 |       | 12413 | 4500 | 54 | 153.7965 | 5.253  |        |        | 15.77  | 6.44   | 0.83 |
| 5   | 12382 |       | 12414 | 4575 | 54 | 153.7965 | 5.338  |        |        | 20.98  | 7.51   | 1.48 |
| 5.5 | 12704 |       |       | 0    | 53 | 153.3521 | 17.45  |        |        |        |        |      |
| 6   | 12714 | 12714 |       | 0    | 52 | 152.0003 | 18     | 1.1671 | 2.088  |        |        |      |
| 6   | 12751 | 12751 |       | 25   | 52 | 152.0003 | 22.549 | 1.1614 | 2.1125 |        |        |      |
| 6   | 12748 | 12749 | 12706 | 40   | 52 | 152.0003 | 21.251 | 1.1652 | 2.0917 | 132.63 | 148.22 | 0.69 |
| 6   | 12746 | 12747 | 12707 | 60   | 52 | 152.0003 | 26.46  | 1.1612 | 2.1064 | 31.38  | 193.95 | 0.59 |
| 6   | 12744 | 12745 |       | 90   | 52 | 152.0003 | 28.094 | 1.16   | 2.1118 |        |        |      |
| 6   | 12742 | 12743 | 12708 | 120  | 52 | 152.0003 | 33.213 | 1.1692 | 2.0818 |        |        |      |
| 6   | 12740 | 12741 |       | 150  | 52 | 152.0003 | 39.49  | 1.1581 | 2.1102 |        |        |      |
| 6   | 12738 | 12739 | 12709 | 250  | 52 | 152.0003 | 39.107 | 1.1643 | 2.0994 | 10.69  | 23.49  | 0.31 |
| 6   | 12736 | 12737 | 12710 | 350  | 52 | 152.0003 | 43.395 | 1.1606 | 2.1129 | 9.45   | 16.75  | 0.26 |
| 6   | 12734 | 12735 |       | 440  | 52 | 152.0003 | 44.537 | 1.1586 | 2.1107 |        |        |      |
| 6   | 12732 | 12733 | 12711 | 550  | 52 | 152.0003 | 43.373 | 1.1637 | 2.1024 | 6.49   | 18.11  | 0.21 |
| 6   | 12730 | 12731 | 12712 | 750  | 52 | 152.0003 | 40.445 | 1.1603 | 2.1187 | 7.33   | 28.32  | 0.28 |
| 6   | 12728 | 12789 | 12713 | 1000 | 52 | 152.0003 | 36.031 | 1.1606 | 2.1074 | 7.88   | 33.4   | 0.35 |
| 6   | 12788 | 12729 |       | 1000 | 52 | 152.0003 | 31.969 | 1.1666 | 2.0969 |        |        |      |
| 6   | 12786 | 12787 |       | 1250 | 52 | 152.0003 | 28.149 | 1.1603 | 2.1085 |        |        |      |
| 6   | 12784 | 12785 | 12791 | 1500 | 52 | 152.0003 | 26.6   | 1.1626 | 2.1057 | 6.88   | 24.95  |      |
| 6   | 12782 | 12783 |       | 1750 | 52 | 152.0003 | 23.624 | 1.1658 | 2.1011 |        |        |      |
| 6   | 12780 | 12781 | 12792 | 2000 | 52 | 152.0003 | 21.083 | 1.1641 | 2.1052 | 6.01   | 19.32  | 0.27 |
| 6   | 12778 | 12779 |       | 2200 | 52 | 152.0003 | 19.911 | 1.1644 | 2.1049 |        |        |      |
| 6   | 12776 | 12777 | 12793 | 2500 | 52 | 152.0003 | 14.489 | 1.1685 | 2.0981 | 5.1    | 20.78  | 0.19 |
| 6   | 12774 | 12775 | 12794 | 3000 | 52 | 152.0003 | 11.981 | 1.173  | 2.0909 | 5.07   | 24.74  | 0.25 |
| 6   | 12772 | 12773 | 12795 | 3500 | 52 | 152.0003 | 8.57   | 1.1716 | 2.0957 | 4.59   | 20.11  | 0.16 |
| 6   | 12770 | 12771 | 12796 | 4000 | 52 | 152.0003 | 8.133  | 1.1774 | 2.0869 | 4.7    | 14.34  | 0    |
| 6   | 12768 | 12769 | 12797 | 4500 | 52 | 152.0003 | 5.43   | 1.1783 | 2.0827 | 4.49   | 10.54  | 0.23 |
| 6   | 12766 | 12767 | 12798 | 5065 | 52 | 152.0003 | 6.044  | 1.1756 | 2.0766 | 8.85   | 10.36  | 0.4  |
| 7   | 12852 |       |       | 20   | 50 | 151.9997 | 22.689 |        |        |        |        |      |
| 7   | 12850 |       |       | 35   | 50 | 151.9997 | 22.254 |        |        |        |        |      |
| 7   | 12848 |       |       | 45   | 50 | 151.9997 | 26.405 |        |        |        |        |      |
| 7   | 12846 |       |       | 60   | 50 | 151.9997 | 29.191 |        |        |        |        |      |
| 7   | 12844 |       |       | 70   | 50 | 151.9997 | 27.848 |        |        |        |        |      |
| 7   | 12842 |       |       | 90   | 50 | 151.9997 | 27.743 |        |        |        |        |      |
| 7   | 12840 |       |       | 150  | 50 | 151.9997 | 35.462 |        |        |        |        |      |
| 7   | 12838 |       |       | 250  | 50 | 151.9997 | 34.6   |        |        |        |        |      |
| 7   | 12836 |       |       | 400  | 50 | 151.9997 | 38.988 |        |        |        |        |      |
| 7   | 12834 |       |       | 550  | 50 | 151.9997 | 40.217 |        |        |        |        |      |
| 7   | 12832 |       |       | 750  | 50 | 151.9997 | 37.324 |        |        |        |        |      |
| 7   | 12830 |       |       | 1000 | 50 | 151.9997 | 34.779 |        |        |        |        |      |
| 8   | 12905 | 12905 |       | 0    | 47 | 151.9996 | 18.378 | 1.1623 | 2.1034 |        |        |      |
| 8   | 12902 | 12903 | 12873 | 28   | 47 | 151.9996 | 21.688 | 1.1628 | 2.1012 | 154.05 | 456.72 | 2.56 |
| 8   | 12899 | 12900 | 12874 | 45   | 47 | 151.9996 | 26.724 | 1.1617 | 2.1033 | 147.58 | 580.84 | 2.36 |
| 8   | 12896 | 12897 | 12875 | 65   | 47 | 151.9996 | 32.428 | 1.1652 | 2.0984 | 41.53  | 80.61  | 0.35 |
| 8   | 12893 | 12894 | 12876 | 90   | 47 | 151.9996 | 31.618 | 1.1628 | 2.1017 | 27.2   | 31.52  | 0.31 |
| 8   | 12890 | 12891 |       | 115  | 47 | 151.9996 | 33.786 | 1.1618 | 2.1035 |        |        |      |
| 8   | 12887 | 12888 | 12877 | 149  | 47 | 151.9996 | 38.275 | 1.1616 | 2.1047 | 27.64  | 41.67  | 0.66 |

|     |       |       |       |      |    |          |        |        |        |       |        |      |
|-----|-------|-------|-------|------|----|----------|--------|--------|--------|-------|--------|------|
| 8   | 12884 | 12885 | 12878 | 200  | 47 | 151.9996 | 43.819 | 1.1632 | 2.1026 | 20.41 | 38.38  | 0.54 |
| 8   | 13017 | 13018 | 12879 | 300  | 47 | 151.9996 | 41.775 | 1.1619 | 2.1056 | 10.46 | 25.37  | 0.2  |
| 8   | 12881 | 12882 | 12880 | 400  | 47 | 151.9996 | 43.729 | 1.1621 | 2.1056 | 11.68 | 30.79  | 0.23 |
| 8   | 13014 | 13015 | 12940 | 500  | 47 | 151.9996 | 41.648 | 1.1627 | 2.1055 | 8.01  | 22.08  | 0.31 |
| 8   | 13011 | 13012 | 12941 | 600  | 47 | 151.9996 | 40.431 | 1.1617 | 2.107  |       | 27.43  |      |
| 8   | 13008 | 13009 |       | 700  | 47 | 151.9996 | 40.76  | 1.163  | 2.1052 |       |        |      |
| 8   | 13005 | 13006 | 12942 | 800  | 47 | 151.9996 | 39.1   | 1.1631 | 2.1052 | 6.33  | 21.68  | 0.16 |
| 8   | 13002 | 13003 |       | 900  | 47 | 151.9996 | 37.297 | 1.1636 | 2.1046 |       |        |      |
| 8   | 12999 | 13000 | 12943 | 1000 | 47 | 151.9996 | 36.301 | 1.165  | 2.1022 | 5.89  | 15.96  | 0.17 |
| 8   | 12984 | 12967 |       | 1100 | 47 | 151.9996 | 33.477 | 1.1695 | 2.0859 |       |        |      |
| 8   | 12981 | 12982 | 12944 | 1300 | 47 | 151.9996 | 30.251 | 1.1645 | 2.1054 | 6.22  | 18.07  | 0.14 |
| 8   | 12978 | 12979 |       | 1500 | 47 | 151.9996 | 26.026 | 1.1658 | 2.1032 |       |        |      |
| 8   | 12975 | 12976 | 12945 | 1700 | 47 | 151.9996 | 20.637 | 1.1694 | 2.0967 | 5.51  | 17.73  | 0.11 |
| 8   | 12996 |       | 12946 | 1900 | 47 | 151.9996 | 18.244 |        |        | 5.66  | 19.17  | 0.09 |
| 8   | 12972 | 12997 | 12988 | 1900 | 47 | 151.9996 | 18.738 | 1.1694 | 2.0982 |       | 14.36  |      |
| 8   | 12969 | 12970 |       | 2100 | 47 | 151.9996 | 16.685 | 1.1718 | 2.0945 |       |        |      |
| 8   | 12966 | 12967 | 12989 | 2300 | 47 | 151.9996 | 14.407 | 1.1737 | 2.0917 | 5.24  | 17.91  | 0.13 |
| 8   | 12963 | 12964 |       | 2500 | 47 | 151.9996 | 13.624 | 1.1742 | 2.0918 |       |        |      |
| 8   | 12935 | 12936 |       | 2750 | 47 | 151.9996 | 12.845 | 1.1764 | 2.0876 |       |        |      |
| 8   | 12932 | 12933 | 12990 | 3000 | 47 | 151.9996 | 11.355 | 1.1755 | 2.0911 | 4.45  | 16.34  | 0.07 |
| 8   | 12929 | 12930 |       | 3500 | 47 | 151.9996 | 10.193 | 1.1754 | 2.0919 |       |        |      |
| 8   | 12926 | 12927 | 12991 | 4000 | 47 | 151.9996 | 7.444  | 1.1742 | 2.0918 | 4.32  | 18.39  | 0.17 |
| 8   | 12923 | 12924 | 12992 | 4500 | 47 | 151.9996 | 4.92   | 1.1778 | 2.0875 | 5.28  | 12.38  | 0.32 |
| 8   | 12920 | 12921 | 12993 | 5000 | 47 | 151.9996 | 4.697  | 1.1774 | 2.0885 | 4.43  | 6.03   | 0.43 |
| 8   | 12917 | 12918 | 12994 | 5050 | 47 | 151.9996 | 5.893  | 1.1808 | 2.0801 | 4.56  | 7.43   | 0.23 |
| 8   | 12914 | 12915 | 12995 | 5090 | 47 | 151.9996 | 7.428  | 1.1801 | 2.0814 | 5.02  | 8.76   | 0.49 |
| 8.5 | 13032 |       |       | 0    | 46 | 152      | 20.661 |        |        |       |        |      |
| 9   | 13033 |       |       | 0    | 45 | 151.9999 | 19.617 |        |        |       |        |      |
| 9   | 13070 |       |       | 25   | 45 | 151.9999 | 20.633 |        |        |       |        |      |
| 9   | 13068 |       |       | 43   | 45 | 151.9999 | 23.696 |        |        |       |        |      |
| 9   | 13066 |       |       | 55   | 45 | 151.9999 | 27.187 |        |        |       |        |      |
| 9   | 13064 |       |       | 70   | 45 | 151.9999 | 32.515 |        |        |       |        |      |
| 9   | 13062 |       |       | 90   | 45 | 151.9999 | 34.803 |        |        |       |        |      |
| 9   | 13060 |       |       | 110  | 45 | 151.9999 | 33.681 |        |        |       |        |      |
| 9   | 13058 |       |       | 150  | 45 | 151.9999 | 49.92  |        |        |       |        |      |
| 9   | 13056 |       |       | 250  | 45 | 151.9999 | 52.253 |        |        |       |        |      |
| 9   | 13054 |       |       | 350  | 45 | 151.9999 | 47.971 |        |        |       |        |      |
| 9   | 13052 |       |       | 500  | 45 | 151.9999 | 44.054 |        |        |       |        |      |
| 9   | 13050 |       |       | 750  | 45 | 151.9999 | 42.862 |        |        |       |        |      |
| 9   | 13048 |       |       | 1000 | 45 | 151.9999 | 40.046 |        |        |       |        |      |
| 10  | 13076 |       |       | 0    | 42 | 152      | 26.566 |        |        |       |        |      |
| 10  | 13100 |       |       | 25   | 42 | 152      | 27.613 |        |        |       |        |      |
| 10  | 13098 |       | 13115 | 40   | 42 | 152      | 28.202 |        |        | 43.56 | 114.5  | 0.62 |
| 10  | 13096 |       | 13116 | 60   | 42 | 152      | 30.864 |        |        | 74.66 | 179.81 | 1.43 |
| 10  | 13094 |       | 13117 | 80   | 42 | 152      | 36.924 |        |        | 49.86 | 168.27 | 0.89 |
| 10  | 13092 | 13093 |       | 100  | 42 | 152      | 39.027 | 1.1602 | 2.131  |       |        |      |
| 10  | 13090 | 13091 | 13118 | 150  | 42 | 152      | 49.885 | 1.1609 | 2.1207 | 14.01 | 102.56 | 0.93 |



|      |       |       |       |      |    |          |        |        |        |       |        |      |
|------|-------|-------|-------|------|----|----------|--------|--------|--------|-------|--------|------|
| 10   | 13088 | 13089 | 13119 | 225  | 42 | 152      | 54.921 | 1.1661 | 2.1559 | 15.04 | 89.23  | 0.76 |
| 10   | 13086 | 13087 |       | 300  | 42 | 152      | 55.035 | 1.16   | 2.1097 |       |        |      |
| 10   | 13084 | 13085 | 13120 | 400  | 42 | 152      | 54.267 | 1.1604 | 2.1213 | 14.82 | 100.5  | 0.53 |
| 10   | 13082 | 13083 | 13121 | 600  | 42 | 152      | 47.76  | 1.1619 | 2.1181 | 7.82  | 50.17  | 0.27 |
| 10   | 13080 | 13081 |       | 800  | 42 | 152      | 46.5   | 1.1621 | 2.1168 |       |        |      |
| 10   | 13078 | 13079 | 13122 | 1000 | 42 | 152      | 43.612 | 1.1622 | 2.1169 | 5     | 38.07  | 0.19 |
| 10   | 13157 | 13159 |       | 1000 | 42 | 152      | 41.908 | 1.1632 | 2.1143 |       |        |      |
| 10   | 13155 | 13158 | 13162 | 1240 | 42 | 152      | 34.3   | 1.1639 | 2.1165 | 4.91  | 37.11  | 0.17 |
| 10   | 13153 | 13156 |       | 1500 | 42 | 152      | 28.372 | 1.1648 | 2.1052 |       |        |      |
| 10   | 13151 | 13154 | 13163 | 1750 | 42 | 152      | 21.32  | 1.1675 | 2.1002 |       |        |      |
| 10   | 13149 | 13152 |       | 2000 | 42 | 152      | 17.921 | 1.1665 | 2.1014 |       |        |      |
| 10   | 13147 | 13150 | 13164 | 2250 | 42 | 152      | 13.214 | 1.1645 | 2.1045 |       |        |      |
| 10   | 13145 | 13146 | 13165 | 2750 | 42 | 152      | 12.506 | 1.1655 | 2.1025 | 4.41  | 36.15  | 0.11 |
| 10   | 13143 | 13144 | 13166 | 3500 | 42 | 152      | 9.84   | 1.162  | 2.1048 | 5.27  | 35.37  | 0.06 |
| 10   | 13141 | 13142 |       | 4250 | 42 | 152      | 6.228  | 1.1557 | 2.1121 |       |        |      |
| 10   | 13139 | 13140 | 13167 | 4900 | 42 | 152      | 5.638  | 1.1659 | 2.0945 | 14.33 | 10.32  | 0.29 |
| 10   | 13137 | 13138 | 13168 | 5015 | 42 | 152      | 6      | 1.1603 | 2.103  | 14.85 | 10.75  | 0.51 |
| 10   | 13135 |       | 13169 | 5055 | 42 | 152      | 6      |        |        | 12.34 | 11.27  | 0.61 |
| 10.5 | 13186 |       |       | 0    | 40 | 152      | 25.369 |        |        |       |        |      |
| 11.5 | 13235 |       |       | 0    | 38 | 152      | 38.663 |        |        |       |        |      |
| 12   | 13236 | 13236 |       | 0    | 37 | 152.0001 | 43.959 | 1.161  | 2.1078 |       |        |      |
| 12   | 13189 | 13190 | 13227 | 25   | 37 | 152.0001 | 42.304 | 1.1609 | 2.1062 | 20.15 | 21.46  | 0.25 |
| 12   | 13211 | 13212 | 13305 | 40   | 37 | 152.0001 | 41.699 | 1.1621 | 2.1062 | 22.3  | 24.86  | 0.24 |
| 12   | 13209 | 13210 | 13228 | 60   | 37 | 152.0001 | 42.66  | 1.1615 | 2.1069 |       | 79.31  |      |
| 12   | 13207 | 13208 |       | 75   | 37 | 152.0001 | 44.126 | 1.1616 | 2.1063 |       |        |      |
| 12   | 13205 | 13206 | 13229 | 85   | 37 | 152.0001 | 42.567 | 1.1625 | 2.1053 |       | 47.07  |      |
| 12   | 13203 | 13204 |       | 95   | 37 | 152.0001 | 42.619 | 1.1589 | 2.1092 |       |        |      |
| 12   | 13201 | 13202 | 13230 | 105  | 37 | 152.0001 | 44.456 | 1.1613 | 2.1069 | 24.08 | 66.05  | 0.34 |
| 12   | 13199 | 13200 |       | 140  | 37 | 152.0001 | 51     | 1.1615 | 2.1076 |       |        |      |
| 12   | 13197 | 13198 | 13231 | 180  | 37 | 152.0001 | 57.164 | 1.1612 | 2.1087 | 10.67 | 63.57  | 0.4  |
| 12   | 13195 | 13196 |       | 250  | 37 | 152.0001 | 61.616 | 1.1653 | 2.0999 |       |        |      |
| 12   | 13193 | 13194 |       | 325  | 37 | 152.0001 | 61.563 | 1.1611 | 2.1081 |       |        |      |
| 12   | 13191 | 13192 | 13232 | 425  | 37 | 152.0001 | 60.473 | 1.1608 | 2.108  | 12.8  | 100.87 | 0.38 |
| 12   | 13335 | 13336 |       | 425  | 37 | 152.0001 | 58.421 | 1.1609 | 2.1087 |       |        |      |
| 12   | 13333 | 13334 |       | 500  | 37 | 152.0001 | 54.361 | 1.1604 | 2.109  |       |        |      |
| 12   | 13331 | 13332 | 13233 | 600  | 37 | 152.0001 | 50.395 | 1.1608 | 2.1101 | 9.9   | 68.71  | 0.24 |
| 12   | 13329 | 13330 |       | 700  | 37 | 152.0001 | 51.885 | 1.1607 | 2.1092 |       |        |      |
| 12   | 13327 | 13328 |       | 800  | 37 | 152.0001 | 47.895 | 1.1626 | 2.1067 |       |        |      |
| 12   | 13325 | 13326 |       | 900  | 37 | 152.0001 | 44.925 | 1.1627 | 2.1058 |       |        |      |
| 12   | 13323 | 13324 | 13234 | 1100 | 37 | 152.0001 | 35.707 | 1.1647 | 2.1038 | 6.05  | 49.16  | 0.12 |
| 12   | 13321 | 13322 |       | 1300 | 37 | 152.0001 | 28.175 | 1.1669 | 2.1022 |       |        |      |
| 12   | 13319 | 13320 |       | 1500 | 37 | 152.0001 | 21.53  | 1.1661 | 2.1022 |       |        |      |
| 12   | 13317 | 13318 |       | 1700 | 37 | 152.0001 | 16.614 | 1.1658 | 2.1003 |       |        |      |
| 12   | 13315 | 13316 | 13306 | 1900 | 37 | 152.0001 | 14.813 | 1.1753 | 2.0912 | 5.76  | 44.56  | 0.09 |
| 12   | 13313 | 13314 |       | 2100 | 37 | 152.0001 | 14.299 | 1.172  | 2.0952 |       |        |      |
| 12   | 13285 | 13286 |       | 2100 | 37 | 152.0001 | 14.274 | 1.172  | 2.0973 |       |        |      |
| 12   | 13283 | 13284 |       | 2300 | 37 | 152.0001 | 12.477 | 1.1748 | 2.0945 |       |        |      |

|      |       |       |       |      |    |          |        |        |        |       |       |      |
|------|-------|-------|-------|------|----|----------|--------|--------|--------|-------|-------|------|
| 12   | 13281 | 13282 |       | 2500 | 37 | 152.0001 | 11.916 | 1.1667 | 2.1044 |       |       |      |
| 12   | 13279 | 13280 | 13307 | 2750 | 37 | 152.0001 | 11.646 | 1.1669 | 2.1088 | 5.13  | 41.84 | 0.09 |
| 12   | 13277 | 13278 |       | 3000 | 37 | 152.0001 | 10.287 | 1.1715 | 2.1022 |       |       |      |
| 12   | 13275 |       | 13308 | 3500 | 37 | 152.0001 | 9.934  |        |        | 4.31  | 33.67 | 0.05 |
| 12   | 13273 | 13274 |       | 4000 | 37 | 152.0001 | 7.037  | 1.1651 | 2.1027 |       |       |      |
| 12   | 13271 |       | 13309 | 4500 | 37 | 152.0001 | 6.311  |        |        | 2.63  | 20.65 | 0.05 |
| 12   | 13269 |       |       | 5000 | 37 | 152.0001 | 7.681  |        |        |       |       |      |
| 12   | 13267 |       | 13310 | 5425 | 37 | 152.0001 | 7.508  |        |        | 3.39  | 5.15  | 0.15 |
| 12   | 13265 |       | 13311 | 5505 | 37 | 152.0001 | 5.258  |        |        | 1.93  | 4.12  | 0.13 |
| 12   | 13263 |       | 13312 | 5545 | 37 | 152.0001 | 8.796  |        |        | 3.03  | 3.94  | 0.17 |
| 12.5 | 13349 |       |       | 0    | 36 | 152      | 41.418 |        |        |       |       |      |
| 13   | 13374 |       |       | 0    | 34 | 152.0017 | 46.051 |        |        |       |       |      |
| 13   | 13372 |       |       | 25   | 34 | 152.0017 | 47.517 |        |        |       |       |      |
| 13   | 13370 |       |       | 50   | 34 | 152.0017 | 46.678 |        |        |       |       |      |
| 13   | 13368 |       |       | 75   | 34 | 152.0017 | 46.939 |        |        |       |       |      |
| 13   | 13366 |       |       | 100  | 34 | 152.0017 | 49.012 |        |        |       |       |      |
| 13   | 13364 |       |       | 125  | 34 | 152.0017 | 55.304 |        |        |       |       |      |
| 13   | 13362 |       |       | 150  | 34 | 152.0017 | 58.681 |        |        |       |       |      |
| 13   | 13360 |       |       | 250  | 34 | 152.0017 | 62.869 |        |        |       |       |      |
| 13   | 13358 |       |       | 350  | 34 | 152.0017 | 71.177 |        |        |       |       |      |
| 13   | 13356 |       |       | 500  | 34 | 152.0017 | 63.484 |        |        |       |       |      |
| 13   | 13354 |       |       | 650  | 34 | 152.0017 | 59.584 |        |        |       |       |      |
| 13   | 13352 |       |       | 800  | 34 | 152.0017 | 50.061 |        |        |       |       |      |
| 13   | 13350 |       |       | 1000 | 34 | 152.0017 | 38.765 |        |        |       |       |      |
| 13.5 | 13401 |       |       | 0    | 33 | 152      | 38.414 |        |        |       |       |      |
| 14   | 13414 | 13414 |       | 0    | 32 | 151.9999 | 37.566 | 1.1628 | 2.1048 |       |       |      |
| 14   | 13437 |       | 13393 | 25   | 32 | 151.9999 | 40.585 |        |        | 18.67 | 28.49 | 0.52 |
| 14   | 13434 | 13435 | 13394 | 45   | 32 | 151.9999 | 45.112 | 1.1679 | 2.0987 | 24.29 | 27.71 | 0.56 |
| 14   | 13431 | 13432 | 13395 | 75   | 32 | 151.9999 | 45.06  | 1.1637 | 2.1035 | 20.18 | 24.23 | 0.62 |
| 14   | 13428 | 13429 | 13396 | 100  | 32 | 151.9999 | 46.739 | 1.1629 | 2.1048 | 13.79 | 23.62 | 0.42 |
| 14   | 13425 | 13426 | 13397 | 125  | 32 | 151.9999 | 51.3   | 1.163  | 2.1048 | 10.65 | 21.49 | 0.26 |
| 14   | 13422 | 13423 | 13398 | 150  | 32 | 151.9999 | 58.24  | 1.1624 | 2.1056 | 8.64  | 33.71 | 0.21 |
| 14   | 13419 |       |       | 200  | 32 | 151.9999 | 55.955 |        |        |       |       |      |
| 14   | 13416 | 13417 | 13399 | 300  | 32 | 151.9999 | 60.384 | 1.1603 | 2.107  | 7.07  | 40.03 | 0.37 |
| 14   | 13528 | 13529 |       | 400  | 32 | 151.9999 | 64.321 | 1.1617 | 2.1074 |       |       |      |
| 14   | 13525 | 13526 | 13400 | 500  | 32 | 151.9999 | 58.183 | 1.1607 | 2.1092 | 8.16  | 61.14 | 0.42 |
| 14   | 13522 | 13523 | 13479 | 600  | 32 | 151.9999 | 53.664 | 1.162  | 2.1061 | 9.07  | 64.55 |      |
| 14   | 13519 | 13520 |       | 700  | 32 | 151.9999 | 50.828 | 1.1619 | 2.1065 |       |       |      |
| 14   | 13516 | 13517 | 13480 | 800  | 32 | 151.9999 | 45.239 | 1.1634 | 2.1037 | 5.86  | 46.1  | 0.14 |
| 14   | 13513 | 13514 |       | 900  | 32 | 151.9999 | 40.466 | 1.1645 | 2.1022 |       |       |      |
| 14   | 13510 | 13511 | 13481 | 1000 | 32 | 151.9999 | 32.093 | 1.1689 | 2.0961 | 4.47  | 33.9  | 0.1  |
| 14   | 13507 | 13508 |       | 1100 | 32 | 151.9999 | 29.061 | 1.1698 | 2.0957 |       |       |      |
| 14   | 13569 |       | 13482 | 1200 | 32 | 151.9999 | 22.815 |        |        | 3.59  | 27.7  | 0.08 |
| 14   | 13566 | 13567 |       | 1300 | 32 | 151.9999 | 20.788 | 1.1744 | 2.09   |       |       |      |
| 14   | 13563 | 13564 | 13483 | 1500 | 32 | 151.9999 | 15.103 | 1.1737 | 2.0907 | 3.98  | 24.61 | 0.06 |
| 14   | 13560 | 13561 | 13484 | 1700 | 32 | 151.9999 | 13.591 | 1.1734 | 2.0918 | 3.84  | 29.26 | 0.06 |
| 14   | 13557 | 13558 | 13485 | 1900 | 32 | 151.9999 | 13.454 | 1.1777 | 2.0862 | 3.43  | 28.37 | 0.03 |

|    |       |       |       |      |    |          |        |        |        |       |       |      |
|----|-------|-------|-------|------|----|----------|--------|--------|--------|-------|-------|------|
| 14 | 13554 | 13555 |       | 2100 | 32 | 151.9999 | 9.565  | 1.1794 | 2.0837 |       |       |      |
| 14 | 13551 | 13552 | 13500 | 2300 | 32 | 151.9999 | 9.139  | 1.1812 | 2.0794 | 2.57  | 19.98 | 0.12 |
| 14 | 13548 | 13549 |       | 2500 | 32 | 151.9999 | 9.061  | 1.175  | 2.0867 |       |       |      |
| 14 | 13474 | 13475 | 13501 | 2750 | 32 | 151.9999 | 7.89   | 1.1819 | 2.0792 | 2.33  | 16.02 | 0.1  |
| 14 | 13471 | 13472 |       | 3000 | 32 | 151.9999 | 6.42   | 1.1781 | 2.0835 |       |       |      |
| 14 | 13468 | 13469 | 13502 | 3500 | 32 | 151.9999 | 5.536  | 1.1827 | 2.0802 | 1.15  | 11.33 | 0.08 |
| 14 | 13465 | 13466 |       | 4000 | 32 | 151.9999 | 5.859  | 1.179  | 2.0842 |       |       |      |
| 14 | 13462 |       | 13503 | 4500 | 32 | 151.9999 | 5.841  |        |        | 0.88  | 6.58  | 0.08 |
| 14 | 13459 | 13460 | 13504 | 5085 | 32 | 151.9999 | 5.237  | 1.1894 | 2.0541 | 1.1   | 3.38  | 0.14 |
| 14 | 13456 | 13457 | 13505 | 5165 | 32 | 151.9999 | 7.303  | 1.192  | 2.0653 | 1.1   | 5     | 0.12 |
| 14 | 13453 |       | 13506 | 5205 | 32 | 151.9999 | 5.527  |        |        | 0.99  | 3.85  | 0.13 |
| 15 | 13609 |       |       | 0    | 29 | 151.9997 | 30.348 |        |        |       |       |      |
| 15 | 13607 |       |       | 25   | 29 | 151.9997 | 32.287 |        |        |       |       |      |
| 15 | 13605 |       |       | 50   | 29 | 151.9997 | 31.85  |        |        |       |       |      |
| 15 | 13603 |       |       | 75   | 29 | 151.9997 | 37.063 |        |        |       |       |      |
| 15 | 13601 |       |       | 100  | 29 | 151.9997 | 37.785 |        |        |       |       |      |
| 15 | 13599 |       |       | 125  | 29 | 151.9997 | 40.646 |        |        |       |       |      |
| 15 | 13597 |       |       | 150  | 29 | 151.9997 | 43.748 |        |        |       |       |      |
| 15 | 13595 |       |       | 250  | 29 | 151.9997 | 56.771 |        |        |       |       |      |
| 15 | 13593 |       |       | 350  | 29 | 151.9997 | 63.586 |        |        |       |       |      |
| 15 | 13591 |       |       | 550  | 29 | 151.9997 | 58.732 |        |        |       |       |      |
| 15 | 13589 |       |       | 700  | 29 | 151.9997 | 49.212 |        |        |       |       |      |
| 15 | 13587 |       |       | 900  | 29 | 151.9997 | 36.488 |        |        |       |       |      |
| 15 | 13585 |       |       | 1000 | 29 | 151.9997 | 29.15  |        |        |       |       |      |
| 16 | 13620 | 13620 |       | 0    | 27 | 152      | 26.66  | 1.161  | 2.1019 |       |       |      |
| 16 | 13634 | 13635 | 13611 | 30   | 27 | 152      | 33     | 1.1648 | 2.0991 | 25.31 | 62.18 | 0.21 |
| 16 | 13656 | 13657 | 13612 | 65   | 27 | 152      | 36.179 | 1.163  | 2.1035 | 22.59 | 65.76 | 0.27 |
| 16 | 13654 | 13655 | 13696 | 110  | 27 | 152      | 39.015 | 1.1631 | 2.1035 | 3.25  | 38.04 | 0.42 |
| 16 | 13652 | 13653 | 13613 | 125  | 27 | 152      | 44.675 | 1.162  | 2.1044 |       |       |      |
| 16 | 13650 | 13651 | 13614 | 150  | 27 | 152      | 45.75  | 1.161  | 2.1051 | 10.06 | 45.95 | 0.24 |
| 16 | 13648 | 13649 | 13615 | 200  | 27 | 152      | 54.778 | 1.161  | 2.108  | 6.23  | 27.83 | 0.23 |
| 16 | 13646 | 13647 | 13616 | 300  | 27 | 152      | 60.468 | 1.1611 | 2.1069 | 6.16  | 35    | 0.36 |
| 16 | 13644 | 13645 |       | 400  | 27 | 152      | 63.44  | 1.1606 | 2.1089 |       |       |      |
| 16 | 13642 | 13643 | 13617 | 525  | 27 | 152      | 62.974 | 1.16   | 2.1102 | 6.15  | 39.26 | 0.29 |
| 16 | 13640 | 13641 |       | 600  | 27 | 152      | 52.714 | 1.1609 | 2.1083 |       |       |      |
| 16 | 13638 | 13639 |       | 700  | 27 | 152      | 46.189 | 1.1634 | 2.1036 |       |       |      |
| 16 | 13636 | 13637 | 13618 | 850  | 27 | 152      | 33.478 | 1.1657 | 2.1004 | 4.05  | 23.31 | 0.25 |
| 16 | 13693 |       |       | 850  | 27 | 152      | 34.706 |        |        |       |       |      |
| 16 | 13691 | 13692 |       | 1000 | 27 | 152      | 24.505 | 1.1671 | 2.0984 |       |       |      |
| 16 | 13689 | 13690 | 13697 | 1250 | 27 | 152      | 15.365 | 1.1695 | 2.0967 | 2.33  | 21.99 | 0.16 |
| 16 | 13687 | 13688 |       | 1750 | 27 | 152      | 10.69  | 1.1721 | 2.0941 |       |       |      |
| 16 | 13685 | 13686 | 13698 | 2250 | 27 | 152      | 7.868  | 1.1742 | 2.0894 | 2.54  | 14.24 | 0.1  |
| 16 | 13683 | 13684 |       | 2500 | 27 | 152      | 7.19   | 1.1709 | 2.0962 |       |       |      |
| 16 | 13681 | 13682 | 13699 | 3000 | 27 | 152      | 7.593  | 1.1754 | 2.0904 | 1.65  | 12.84 | 0.07 |
| 16 | 13679 | 13680 | 13700 | 4000 | 27 | 152      | 4.363  | 1.177  | 2.0865 |       | 7.3   |      |
| 16 | 13677 | 13678 |       | 5000 | 27 | 152      | 4.217  | 1.1786 | 2.0811 |       |       |      |
| 16 | 13675 |       | 13701 | 5205 | 27 | 152      | 4.616  |        |        | 1.16  | 4.07  | 0.18 |

|      |       |       |       |      |    |          |        |        |        |       |       |      |
|------|-------|-------|-------|------|----|----------|--------|--------|--------|-------|-------|------|
| 16   | 13673 | 13674 | 13702 | 5285 | 27 | 152      | 3.115  | 1.1811 | 2.0803 | 1.69  | 3.25  | 0    |
| 16   | 13671 |       | 13703 | 5325 | 27 | 152      | 4.498  |        |        | 2.04  | 4.1   | 0.17 |
| 16.5 | 13769 |       |       | 0    | 26 | 152      | 17.075 |        |        |       |       |      |
| 17   | 13721 |       |       | 0    | 24 | 152.0004 | 20.139 |        |        |       |       |      |
| 17   | 13745 |       |       | 40   | 24 | 152.0004 | 25.561 |        |        |       |       |      |
| 17   | 13743 |       |       | 81   | 24 | 152.0004 | 29.364 |        |        |       |       |      |
| 17   | 13741 |       |       | 95   | 24 | 152.0004 | 31.613 |        |        |       |       |      |
| 17   | 13739 |       |       | 111  | 24 | 152.0004 | 32.686 |        |        |       |       |      |
| 17   | 13737 |       |       | 135  | 24 | 152.0004 | 34.713 |        |        |       |       |      |
| 17   | 13735 |       |       | 200  | 24 | 152.0004 | 43     |        |        |       |       |      |
| 17   | 13733 |       |       | 300  | 24 | 152.0004 | 61.794 |        |        |       |       |      |
| 17   | 13731 |       |       | 400  | 24 | 152.0004 | 62.566 |        |        |       |       |      |
| 17   | 13729 |       |       | 500  | 24 | 152.0004 | 53.637 |        |        |       |       |      |
| 17   | 13727 |       |       | 600  | 24 | 152.0004 | 49.435 |        |        |       |       |      |
| 17   | 13725 |       |       | 750  | 24 | 152.0004 | 36.288 |        |        |       |       |      |
| 17   | 13723 |       |       | 1000 | 24 | 152.0004 | 22.243 |        |        |       |       |      |
| 17.5 | 13720 |       |       | 0    | 25 | 152      | 26.337 |        |        |       |       |      |
| 18   | 13782 | 13782 |       | 0    | 22 | 152.0004 | 18.335 | 1.1663 | 2.0986 |       |       |      |
| 18   | 13806 | 13807 | 13761 | 40   | 22 | 152.0004 | 19.875 | 1.1673 | 2.0976 | 21.13 | 20.98 | 0.3  |
| 18   | 13804 | 13805 | 13762 | 80   | 22 | 152.0004 | 26.404 | 1.1643 | 2.1023 | 18.67 | 17.87 | 0.41 |
| 18   | 13802 | 13803 | 13763 | 110  | 22 | 152.0004 | 29.071 | 1.1631 | 2.1041 | 12.65 | 21.87 | 0.33 |
| 18   | 13800 | 13801 |       | 130  | 22 | 152.0004 | 29.06  | 1.1644 | 2.1016 |       |       |      |
| 18   | 13798 | 13799 | 13764 | 150  | 22 | 152.0004 | 36.643 | 1.1647 | 2.1012 | 11.94 | 55.71 | 0.86 |
| 18   | 13796 | 13797 |       | 250  | 22 | 152.0004 | 47.476 | 1.1597 | 2.1094 |       |       |      |
| 18   | 13794 | 13795 | 13765 | 300  | 22 | 152.0004 | 66.641 | 1.1614 | 2.1107 | 5.87  | 33.59 | 0.57 |
| 18   | 13792 | 13793 | 13766 | 450  | 22 | 152.0004 | 59.14  | 1.1596 | 2.1106 | 5.18  | 32.34 | 0.51 |
| 18   | 13790 | 13791 |       | 600  | 22 | 152.0004 | 40.932 | 1.1636 | 2.1037 |       |       |      |
| 18   | 13788 | 13789 | 13767 | 700  | 22 | 152.0004 | 32.936 | 1.1662 | 2.0997 | 3.47  | 20.98 | 0.43 |
| 18   | 13786 | 13787 |       | 850  | 22 | 152.0004 | 25.32  | 1.1696 | 2.0949 |       |       |      |
| 18   | 13784 | 13785 | 13768 | 1000 | 22 | 152.0004 | 17.173 | 1.1713 | 2.0931 | 3.43  | 18.12 | 0.21 |
| 18   | 13843 | 13844 |       | 1000 | 22 | 152.0004 | 17.236 | 1.1714 | 2.094  |       |       |      |
| 18   | 13841 | 13842 | 13858 | 1100 | 22 | 152.0004 | 14.235 | 1.1729 | 2.0917 | 3.65  | 18.46 | 0.33 |
| 18   | 13839 | 13840 |       | 1250 | 22 | 152.0004 | 11.869 | 1.1731 | 2.0927 |       |       |      |
| 18   | 13837 | 13838 | 13859 | 1750 | 22 | 152.0004 | 10.756 | 1.1804 | 2.0813 | 2.79  | 12.36 | 0    |
| 18   | 13835 | 13836 | 13860 | 2250 | 22 | 152.0004 | 7.3    | 1.1793 | 2.0861 | 2.6   | 11.23 | 0    |
| 18   | 13833 | 13834 | 13862 | 2750 | 22 | 152.0004 | 7.577  | 1.181  | 2.0838 |       |       | 0    |
| 18   | 13831 | 13832 | 13863 | 3250 | 22 | 152.0004 | 4.803  | 1.183  | 2.0796 |       |       | 0    |
| 18   | 13829 | 13830 | 13861 | 3750 | 22 | 152.0004 | 5.816  | 1.1804 | 2.0846 |       |       | 0    |
| 18   | 13827 | 13828 | 13864 | 4250 | 22 | 152.0004 | 6.319  | 1.1806 | 2.0841 |       |       | 0    |
| 18   | 13825 | 13826 | 13865 | 4750 | 22 | 152.0004 | 11.843 | 1.1831 | 2.0748 |       |       | 0    |
| 18   | 13823 | 13824 |       | 5095 | 22 | 152.0004 | 3.521  | 1.1855 | 2.0726 |       |       |      |
| 18   | 13821 | 13822 |       | 5135 | 22 | 152.0004 | 3.028  | 1.1806 | 2.0846 |       |       |      |
| 18.3 | 13915 |       |       | 25   | 20 | 154.513  | 19.26  |        |        |       |       |      |
| 18.3 | 13913 |       |       | 100  | 20 | 154.513  | 27.435 |        |        |       |       |      |
| 18.3 | 13911 |       |       | 300  | 20 | 154.513  | 58.663 |        |        |       |       |      |
| 18.3 | 13909 |       | 13885 | 500  | 20 | 154.513  | 35.435 |        |        | 6.26  | 28.61 | 1.64 |
| 18.3 | 13907 |       |       | 800  | 20 | 154.513  | 20.53  |        |        |       |       |      |

|      |       |       |       |      |    |          |        |        |        |       |       |      |
|------|-------|-------|-------|------|----|----------|--------|--------|--------|-------|-------|------|
| 18.3 | 13905 |       | 13886 | 1100 | 20 | 154.513  | 16.3   |        |        | 5.67  | 17.79 | 0.78 |
| 18.3 | 13903 |       | 13887 | 1300 | 20 | 154.513  | 12.95  |        |        | 4.49  | 19.62 | 0.51 |
| 18.3 | 13901 |       | 13888 | 1600 | 20 | 154.513  | 9.778  |        |        |       |       |      |
| 18.3 | 13899 |       | 13889 | 1920 | 20 | 154.513  | 8.705  |        |        | 4.01  | 13.96 | 0.46 |
| 18.3 | 13897 |       | 13890 | 2040 | 20 | 154.513  | 8.634  |        |        | 3.55  | 12.67 | 0.37 |
| 18.3 | 13895 |       | 13891 | 2100 | 20 | 154.513  | 8.684  |        |        | 4.02  | 12.74 | 0.41 |
| 18.3 | 13893 |       | 13892 | 2130 | 20 | 154.513  | 8.663  |        |        | 3.73  | 12.79 | 0.32 |
| 18.6 | 13931 |       |       | 100  | 19 | 155.258  | 21.734 |        |        |       |       |      |
| 18.6 | 13929 |       |       | 630  | 19 | 155.258  | 27.14  |        |        |       |       |      |
| 18.6 | 13927 |       |       | 850  | 19 | 155.258  | 19.056 |        |        |       |       |      |
| 18.6 | 13925 |       |       | 1000 | 19 | 155.258  | 16.186 |        |        |       |       |      |
| 18.6 | 13923 |       |       | 1100 | 19 | 155.258  | 11.457 |        |        |       |       |      |
| 18.6 | 13921 |       |       | 1200 | 19 | 155.258  | 11.345 |        |        |       |       |      |
| 18.6 | 13919 |       |       | 1250 | 19 | 155.258  | 15.295 |        |        |       |       |      |
| 18.6 | 13917 |       |       | 1290 | 19 | 155.258  | 11.323 |        |        |       |       |      |
| 19   | 13963 | 13963 |       | 0    | 18 | 152.0003 | 19.456 | 1.169  | 2.0949 |       |       |      |
| 19   | 13987 | 13988 | 13943 | 25   | 18 | 152.0003 | 19.911 | 1.1723 | 2.0913 | 17.44 | 31.33 | 0.17 |
| 19   | 13985 | 13986 | 13944 | 55   | 18 | 152.0003 | 23.201 | 1.1747 | 2.0858 | 18.51 | 20.52 | 0    |
| 19   | 13983 | 13984 |       | 80   | 18 | 152.0003 | 26.563 | 1.1731 | 2.0877 |       |       |      |
| 19   | 13981 | 13982 | 13945 | 110  | 18 | 152.0003 | 28.056 | 1.1732 | 2.0884 | 14.12 | 23.97 | 0.93 |
| 19   | 13979 | 13980 |       | 120  | 18 | 152.0003 | 30.064 | 1.1711 | 2.0917 |       |       |      |
| 19   | 13977 | 13978 |       | 160  | 18 | 152.0003 | 37.806 | 1.1682 | 2.0964 |       |       |      |
| 19   | 13975 | 13976 |       | 210  | 18 | 152.0003 | 50.773 | 1.1666 | 2.0989 |       |       |      |
| 19   | 13973 | 13974 | 13946 | 260  | 18 | 152.0003 | 53.089 | 1.1662 | 2.1002 | 5.74  | 27.45 | 0.79 |
| 19   | 13971 | 13972 |       | 300  | 18 | 152.0003 | 63.736 | 1.1607 | 2.1089 |       |       |      |
| 19   | 13969 | 13970 |       | 350  | 18 | 152.0003 | 59.801 | 1.1612 | 2.1071 |       |       |      |
| 19   | 13967 | 13968 | 13947 | 400  | 18 | 152.0003 | 48.737 | 1.1616 | 2.1057 | 4.77  | 29.63 | 0.27 |
| 19   | 13965 | 13966 | 13948 | 550  | 18 | 152.0003 | 36.449 | 1.1667 | 2.0965 | 3.65  | 22.5  | 0.25 |
| 19   | 14085 | 14086 |       | 550  | 18 | 152.0003 | 33.079 | 1.1659 | 2.0983 |       |       |      |
| 19   | 14083 | 14084 |       | 650  | 18 | 152.0003 | 25.558 | 1.1665 | 2.0981 |       |       |      |
| 19   | 14081 | 14082 | 13949 | 800  | 18 | 152.0003 | 20.296 | 1.169  | 2.096  | 3.92  | 18.59 | 0.23 |
| 19   | 14079 | 14080 |       | 900  | 18 | 152.0003 | 18.58  | 1.1711 | 2.0923 |       |       |      |
| 19   | 14077 | 14078 |       | 1000 | 18 | 152.0003 | 15.187 | 1.1683 | 2.0958 |       |       |      |
| 19   | 14075 | 14076 | 13950 | 1075 | 18 | 152.0003 | 13.982 | 1.1738 | 2.0895 | 3.24  | 16.87 | 0.09 |
| 19   | 14073 | 14074 |       | 1145 | 18 | 152.0003 | 14.708 | 1.1762 | 2.0857 |       |       |      |
| 19   | 14071 | 14072 |       | 1200 | 18 | 152.0003 | 11.817 | 1.1742 | 2.0905 |       |       |      |
| 19   | 14069 | 14070 |       | 1300 | 18 | 152.0003 | 11.106 | 1.1758 | 2.0876 |       |       |      |
| 19   | 14067 | 14068 | 14015 | 1500 | 18 | 152.0003 | 11.448 | 1.1798 | 2.0819 | 2.6   | 10.09 |      |
| 19   | 14065 | 14066 |       | 1700 | 18 | 152.0003 | 9.339  | 1.1767 | 2.0857 |       |       |      |
| 19   | 14063 | 14064 |       | 1900 | 18 | 152.0003 | 8.212  | 1.1798 | 2.0821 |       |       |      |
| 19   | 14045 | 14064 |       | 1900 | 18 | 152.0003 | 9.058  | 1.1795 | 2.0833 |       |       |      |
| 19   | 14043 | 14044 | 14016 | 2100 | 18 | 152.0003 | 7.203  | 1.1817 | 2.0808 | 2.21  | 9.45  |      |
| 19   | 14041 | 14042 |       | 2300 | 18 | 152.0003 | 6.183  | 1.1809 | 2.0831 |       |       |      |
| 19   | 14039 | 14040 |       | 2500 | 18 | 152.0003 | 5.081  | 1.1813 | 2.0833 |       |       |      |
| 19   | 14037 | 14038 | 14017 | 2700 | 18 | 152.0003 | 4.722  | 1.1828 | 2.0806 | 1.88  | 9.46  | 0.25 |
| 19   | 14035 | 14036 |       | 3000 | 18 | 152.0003 | 4.201  | 1.1818 | 2.0809 |       |       |      |
| 19   | 14033 | 14034 | 14018 | 3500 | 18 | 152.0003 | 3.436  | 1.1838 | 2.0789 | 1.77  | 8.62  | 0.07 |

|      |       |       |       |      |    |          |        |        |        |       |       |      |
|------|-------|-------|-------|------|----|----------|--------|--------|--------|-------|-------|------|
| 19   | 14031 | 14032 |       | 4000 | 18 | 152.0003 | 3.307  | 1.181  | 2.0798 |       |       |      |
| 19   | 14029 | 14030 | 14019 | 4500 | 18 | 152.0003 | 3.373  | 1.1822 | 2.0789 | 1.78  | 6.07  | 0.21 |
| 19   | 14027 | 14028 | 14020 | 4970 | 18 | 152.0003 | 6.243  | 1.1822 | 2.0797 | 2.26  | 4.76  | 0.24 |
| 19   | 14025 | 14026 | 14021 | 5050 | 18 | 152.0003 | 3.205  | 1.189  | 2.0666 | 2.23  | 4.56  | 0.24 |
| 19   | 14023 | 14024 | 14022 | 5090 | 18 | 152.0003 | 2.641  | 1.1853 | 2.0759 | 2.2   | 5.47  | 0.11 |
| 19.5 | 14087 |       |       | 0    | 16 | 152      | 24.252 |        |        |       |       |      |
| 20   | 14101 |       |       | 0    | 14 | 152.0002 | 18.397 |        |        |       |       |      |
| 20   | 14125 |       |       | 20   | 14 | 152.0002 | 22.42  |        |        |       |       |      |
| 20   | 14123 |       |       | 60   | 14 | 152.0002 | 26.31  |        |        |       |       |      |
| 20   | 14121 |       |       | 80   | 14 | 152.0002 | 30.335 |        |        |       |       |      |
| 20   | 14119 |       |       | 100  | 14 | 152.0002 | 40.279 |        |        |       |       |      |
| 20   | 14117 |       |       | 120  | 14 | 152.0002 | 47.288 |        |        |       |       |      |
| 20   | 14115 |       |       | 150  | 14 | 152.0002 | 39.878 |        |        |       |       |      |
| 20   | 14113 |       |       | 200  | 14 | 152.0002 | 31.57  |        |        |       |       |      |
| 20   | 14111 |       |       | 260  | 14 | 152.0002 | 30.985 |        |        |       |       |      |
| 20   | 14109 |       |       | 350  | 14 | 152.0002 | 25.873 |        |        |       |       |      |
| 20   | 14107 |       |       | 500  | 14 | 152.0002 | 20.931 |        |        |       |       |      |
| 20   | 14105 |       |       | 750  | 14 | 152.0002 | 16.726 |        |        |       |       |      |
| 20   | 14103 |       |       | 1000 | 14 | 152.0002 | 14.426 |        |        |       |       |      |
| 21   | 14137 | 14137 |       | 0    | 11 | 152.0004 | 16.587 | 1.1669 | 2.0993 |       |       |      |
| 21   | 14161 | 14162 | 14129 | 20   | 11 | 152.0004 | 20.096 | 1.1687 | 2.0952 | 17.8  | 34.06 | 0.26 |
| 21   | 14159 | 14160 | 14130 | 45   | 11 | 152.0004 | 30.714 | 1.1623 | 2.1062 | 26.56 | 56.66 | 0.5  |
| 21   | 14157 | 14158 |       | 60   | 11 | 152.0004 | 37.348 | 1.1633 | 2.1042 |       |       |      |
| 21   | 14155 | 14156 |       | 80   | 11 | 152.0004 | 40.242 | 1.1623 | 2.1065 |       |       |      |
| 21   | 14153 | 14154 | 14131 | 100  | 11 | 152.0004 | 35.199 | 1.1631 | 2.1049 | 10.44 | 13.49 | 0.07 |
| 21   | 14151 | 14152 |       | 125  | 11 | 152.0004 | 28.94  | 1.1651 | 2.0998 |       |       |      |
| 21   | 14149 | 14150 | 14132 | 150  | 11 | 152.0004 | 26.45  | 1.1651 | 2.099  | 5.23  | 12.83 | 0.06 |
| 21   | 14147 | 14148 |       | 175  | 11 | 152.0004 | 25.765 | 1.1659 | 2.0977 |       |       |      |
| 21   | 14145 | 14146 |       | 200  | 11 | 152.0004 | 26.067 | 1.1676 | 2.0949 |       |       |      |
| 21   | 14143 | 14144 | 14133 | 250  | 11 | 152.0004 | 24.527 | 1.1671 | 2.0953 | 6.57  | 27.53 | 0.11 |
| 21   | 14141 | 14142 |       | 300  | 11 | 152.0004 | 23.738 | 1.1657 | 2.0965 |       |       |      |
| 21   | 14139 | 14140 | 14134 | 400  | 11 | 152.0004 | 22.96  | 1.1688 | 2.0927 | 5.5   | 25.58 | 0.18 |
| 21   | 14261 | 14262 |       | 400  | 11 | 152.0004 | 25.194 | 1.1695 | 2.0917 |       |       |      |
| 21   | 14259 | 14260 |       | 500  | 11 | 152.0004 | 22.274 | 1.1705 | 2.0909 |       |       |      |
| 21   | 14257 | 14258 | 14135 | 600  | 11 | 152.0004 | 18.196 | 1.1712 | 2.0903 | 4.96  | 24.15 | 0.11 |
| 21   | 14255 | 14256 |       | 700  | 11 | 152.0004 | 17.146 | 1.1725 | 2.0887 |       |       |      |
| 21   | 14253 | 14254 |       | 800  | 11 | 152.0004 | 13.803 | 1.175  | 2.0853 |       |       |      |
| 21   | 14251 | 14252 | 14136 | 900  | 11 | 152.0004 | 13.066 | 1.1725 | 2.0903 | 3.81  | 20.09 | 0.08 |
| 21   | 14249 | 14250 |       | 1000 | 11 | 152.0004 | 12.105 | 1.1747 | 2.087  |       |       |      |
| 21   | 14247 | 14248 |       | 1200 | 11 | 152.0004 | 10.337 | 1.1753 | 2.087  |       |       |      |
| 21   | 14245 | 14246 | 14231 | 1400 | 11 | 152.0004 | 8.096  | 1.1782 | 2.0839 | 3.13  | 18.28 | 0.11 |
| 21   | 14243 | 14244 |       | 1600 | 11 | 152.0004 | 7.627  | 1.1868 | 2.0709 |       |       |      |
| 21   | 14241 |       |       | 1800 | 11 | 152.0004 | 7.895  |        |        |       |       |      |
| 21   | 14239 | 14240 | 14232 | 2000 | 11 | 152.0004 | 7.087  | 1.1837 | 2.0772 | 2.86  | 16.15 | 0.06 |
| 21   | 14211 | 14212 |       | 2000 | 11 | 152.0004 | 6.285  | 1.1843 | 2.0777 |       |       |      |
| 21   | 14209 | 14210 |       | 2250 | 11 | 152.0004 | 5.401  | 1.1834 | 2.0772 |       |       |      |
| 21   | 14207 | 14208 | 14233 | 2500 | 11 | 152.0004 | 4.523  | 1.1851 | 2.0728 | 2.68  | 13.99 | 0.07 |

|      |       |       |       |      |    |          |        |        |        |       |       |      |
|------|-------|-------|-------|------|----|----------|--------|--------|--------|-------|-------|------|
| 21   | 14205 | 14206 |       | 2750 | 11 | 152.0004 | 3.252  | 1.186  | 2.0694 |       |       |      |
| 21   | 14203 | 14204 |       | 3000 | 11 | 152.0004 | 3.006  | 1.1875 | 2.0687 |       |       |      |
| 21   | 14201 | 14202 | 14234 | 3250 | 11 | 152.0004 | 2.89   | 1.1859 | 2.0718 | 1.86  | 12.78 | 0.06 |
| 21   | 14199 | 14200 |       | 3750 | 11 | 152.0004 | 2.961  | 1.1894 | 2.0666 |       |       |      |
| 21   | 14197 | 14198 | 14235 | 4250 | 11 | 152.0004 | 4.114  | 1.1862 | 2.0717 | 1.15  | 8.52  | 0.06 |
| 21   | 14195 |       |       | 4750 | 11 | 152.0004 | 2.119  |        |        |       |       |      |
| 21   | 14193 | 14194 | 14236 | 5218 | 11 | 152.0004 | 3.537  | 1.1886 | 2.0697 | 1.74  | 4.96  | 0.23 |
| 21   | 14191 | 14192 | 14237 | 5298 | 11 | 152.0004 | 2.555  | 1.1895 | 2.0693 | 1.57  | 4.54  | 0.26 |
| 21   | 14189 | 14190 | 14238 | 5338 | 11 | 152.0004 | 2.892  | 1.1876 | 2.0728 | 1.91  | 5.6   | 0.26 |
| 21.5 | 14127 |       |       | 0    | 13 | 152      | 16.94  |        |        |       |       |      |
| 22   | 14275 |       |       | 0    | 9  | 151.9965 | 16.135 |        |        |       |       |      |
| 22   | 14311 |       |       | 20   | 9  | 151.9965 | 16.971 |        |        |       |       |      |
| 22   | 14309 |       |       | 60   | 9  | 151.9965 | 37.315 |        |        |       |       |      |
| 22   | 14307 |       |       | 80   | 9  | 151.9965 | 42.938 |        |        |       |       |      |
| 22   | 14305 |       |       | 100  | 9  | 151.9965 | 37.825 |        |        |       |       |      |
| 22   | 14303 |       |       | 120  | 9  | 151.9965 | 30.567 |        |        |       |       |      |
| 22   | 14301 |       |       | 150  | 9  | 151.9965 | 27.527 |        |        |       |       |      |
| 22   | 14299 |       |       | 200  | 9  | 151.9965 | 25.366 |        |        |       |       |      |
| 22   | 14297 |       |       | 260  | 9  | 151.9965 | 30.507 |        |        |       |       |      |
| 22   | 14295 |       |       | 350  | 9  | 151.9965 | 24.055 |        |        |       |       |      |
| 22   | 14293 |       |       | 500  | 9  | 151.9965 | 19.77  |        |        |       |       |      |
| 22   | 14291 |       |       | 750  | 9  | 151.9965 | 15.952 |        |        |       |       |      |
| 22   | 14289 |       |       | 1000 | 9  | 151.9965 | 12.906 |        |        |       |       |      |
| 23   | 14322 |       |       | 0    | 7  | 151.9919 | 13.32  |        |        |       |       |      |
| 23   | 14357 |       | 14314 | 25   | 7  | 151.9919 | 18.467 |        |        | 14.69 | 22.34 | 0.09 |
| 23   | 14354 |       |       | 60   | 7  | 151.9919 | 17.7   |        |        |       |       |      |
| 23   | 14351 |       | 14315 | 80   | 7  | 151.9919 | 21.732 |        |        | 19.91 | 25.01 | 0.39 |
| 23   | 14348 |       | 14316 | 100  | 7  | 151.9919 | 29.312 |        |        | 12.46 | 23.08 | 0.21 |
| 23   | 14345 |       |       | 130  | 7  | 151.9919 | 39.699 |        |        |       |       |      |
| 23   | 14342 |       | 14317 | 160  | 7  | 151.9919 | 37.864 |        |        | 6.59  | 19.43 | 0.12 |
| 23   | 14339 |       | 14318 | 200  | 7  | 151.9919 | 29.755 |        |        | 5.83  | 23    | 0.17 |
| 23   | 14336 |       | 14319 | 300  | 7  | 151.9919 | 25.066 |        |        | 7.78  | 39.53 | 0.14 |
| 23   | 14472 |       | 14320 | 500  | 7  | 151.9919 | 19.361 |        |        | 5.4   | 27.8  | 0.14 |
| 23   | 14469 |       |       | 600  | 7  | 151.9919 | 18.225 |        |        |       |       |      |
| 23   | 14466 |       | 14321 | 800  | 7  | 151.9919 | 13.708 |        |        |       | 19.22 |      |
| 23   | 14463 |       |       | 1000 | 7  | 151.9919 | 10.953 |        |        |       |       |      |
| 23   | 14460 |       | 14399 | 1250 | 7  | 151.9919 | 9.526  |        |        | 3.42  | 16.77 | 0    |
| 23   | 14457 |       |       | 1500 | 7  | 151.9919 | 8.192  |        |        |       |       |      |
| 23   | 14454 |       | 14400 | 1750 | 7  | 151.9919 | 6.908  |        |        | 2.56  | 16.48 | 0.08 |
| 23   | 14451 |       |       | 2000 | 7  | 151.9919 | 4.853  |        |        |       |       |      |
| 23   | 14427 |       | 14401 | 2150 | 7  | 151.9919 | 4.996  |        |        | 2.38  | 14.77 | 0.04 |
| 23   | 14424 |       | 14402 | 2300 | 7  | 151.9919 | 5.126  |        |        | 2     | 13.18 | 0.04 |
| 23   | 14421 |       | 14403 | 2450 | 7  | 151.9919 | 3.696  |        |        | 2.36  | 13    | 0.04 |
| 23   | 14418 |       | 14404 | 2600 | 7  | 151.9919 | 2.853  |        |        | 1.85  | 12.36 | 0.04 |
| 23   | 14415 |       | 14405 | 2750 | 7  | 151.9919 | 1.929  |        |        | 1.98  | 11.61 | 0.05 |
| 23   | 14412 |       | 14443 | 2900 | 7  | 151.9919 | 1.778  |        |        | 2.01  | 11.38 | 0.04 |
| 23   | 14409 |       | 14444 | 3100 | 7  | 151.9919 | 2.172  |        |        | 1.9   | 11.84 | 0.04 |

|    |       |       |       |      |   |          |        |        |        |       |       |      |
|----|-------|-------|-------|------|---|----------|--------|--------|--------|-------|-------|------|
| 23 | 14406 |       | 14445 | 3300 | 7 | 151.9919 | 2.227  |        | 2.39   | 11.96 | 0.02  |      |
| 23 | 14394 |       | 14446 | 3500 | 7 | 151.9919 | 2.935  |        | 1.78   | 11.41 | 0.04  |      |
| 23 | 14391 |       |       | 3750 | 7 | 151.9919 | 2.505  |        |        |       |       |      |
| 23 | 14388 |       | 14447 | 4000 | 7 | 151.9919 | 2.437  |        | 1.62   | 9     | 0.04  |      |
| 23 | 14385 |       | 14448 | 4500 | 7 | 151.9919 | 2.071  |        | 2.13   | 8.6   | 0.08  |      |
| 23 | 14382 |       | 14449 | 4750 | 7 | 151.9919 | 2.667  |        | 1.71   | 6.32  | 0.12  |      |
| 23 | 14379 |       | 14450 | 5050 | 7 | 151.9919 | 2.902  |        | 1.41   | 5.97  | 0.17  |      |
| 23 | 14376 |       |       | 5130 | 7 | 151.9919 | 2.78   |        |        |       |       |      |
| 23 | 14373 |       |       | 5170 | 7 | 151.9919 | 2.737  |        |        |       |       |      |
| 24 | 14487 |       |       | 0    | 6 | 152.0008 | 12.608 |        |        |       |       |      |
| 25 | 14537 |       |       | 0    | 5 | 151.9959 | 13.524 |        |        |       |       |      |
| 25 | 14535 |       | 14505 | 25   | 5 | 151.9959 | 16.139 |        | 18.06  | 22.05 | 0.13  |      |
| 25 | 14533 | 14534 |       | 50   | 5 | 151.9959 | 16.513 | 1.1661 | 2.1007 |       |       |      |
| 25 | 14531 | 14532 | 14506 | 80   | 5 | 151.9959 | 17.643 | 1.1629 | 2.1055 | 31.09 | 52.8  | 0.33 |
| 25 | 14529 | 14530 |       | 100  | 5 | 151.9959 | 18.067 | 1.1633 | 2.1034 |       |       |      |
| 25 | 14527 | 14528 | 14507 | 125  | 5 | 151.9959 | 19.327 | 1.1643 | 2.0998 | 15.37 | 23.96 | 0.16 |
| 25 | 14525 | 14526 |       | 150  | 5 | 151.9959 | 32.195 | 1.1642 | 2.0988 |       |       |      |
| 25 | 14523 | 14524 | 14508 | 200  | 5 | 151.9959 | 33.271 | 1.1651 | 2.0982 | 6.29  | 24.09 | 0.13 |
| 25 | 14521 | 14522 |       | 250  | 5 | 151.9959 | 25.37  | 1.17   | 2.0921 |       |       |      |
| 25 | 14519 | 14520 |       | 300  | 5 | 151.9959 | 19.835 | 1.1865 | 2.0676 |       |       |      |
| 25 | 14517 | 14518 |       | 350  | 5 | 151.9959 | 18.651 | 1.1756 | 2.0858 |       |       |      |
| 25 | 14515 | 14516 |       | 400  | 5 | 151.9959 | 19.117 | 1.1665 | 2.0984 |       |       |      |
| 25 | 14513 | 14514 |       | 450  | 5 | 151.9959 | 18.526 | 1.1661 | 2.0989 |       |       |      |
| 25 | 14619 | 14618 |       | 450  | 5 | 151.9959 | 18.57  | 1.167  | 2.0947 |       |       |      |
| 25 | 14617 | 14616 | 14509 | 500  | 5 | 151.9959 | 18.459 | 1.1687 | 2.0932 | 4.71  | 22.47 | 0.1  |
| 25 | 14615 | 14614 |       | 600  | 5 | 151.9959 | 16.682 | 1.1715 | 2.0889 |       |       |      |
| 25 | 14613 | 14612 |       | 700  | 5 | 151.9959 | 15.16  | 1.1717 | 2.0891 |       |       |      |
| 25 | 14611 | 14610 | 14510 | 800  | 5 | 151.9959 | 12.889 | 1.1699 | 2.0921 | 3.88  | 19.96 |      |
| 25 | 14609 | 14608 |       | 900  | 5 | 151.9959 | 12.157 | 1.1746 | 2.0848 |       |       |      |
| 25 | 14607 | 14606 |       | 1000 | 5 | 151.9959 | 12.161 | 1.1722 | 2.0903 |       |       |      |
| 25 | 14605 | 14604 |       | 1200 | 5 | 151.9959 | 16.122 | 1.1755 | 2.086  |       |       |      |
| 25 | 14603 | 14602 |       | 1400 | 5 | 151.9959 | 7.946  | 1.176  | 2.087  |       |       |      |
| 25 | 14601 | 14600 | 14511 | 1600 | 5 | 151.9959 | 6.662  | 1.1815 | 2.0725 | 3.29  | 17.01 | 0.03 |
| 25 | 14599 | 14598 |       | 1800 | 5 | 151.9959 | 5.659  |        |        |       |       |      |
| 25 | 14597 |       | 14512 | 2000 | 5 | 151.9959 | 5.055  |        | 2.86   | 14.52 | 0.03  |      |
| 25 | 14574 |       |       | 2000 | 5 | 151.9959 | 5.516  |        |        |       |       |      |
| 25 | 14572 | 14573 |       | 2200 | 5 | 151.9959 | 3.653  | 1.1817 | 2.0706 |       |       |      |
| 25 | 14570 |       |       | 2400 | 5 | 151.9959 | 3.041  |        |        |       |       |      |
| 25 | 14568 | 14569 | 14577 | 2600 | 5 | 151.9959 | 2.839  | 1.1849 | 2.063  | 2.62  | 10.22 |      |
| 25 | 14566 |       |       | 2800 | 5 | 151.9959 | 1.687  |        |        |       |       |      |
| 25 | 14564 | 14565 | 14578 | 3000 | 5 | 151.9959 | 13.045 | 1.1859 | 2.0715 | 2.48  | 11.5  | 0.03 |
| 25 | 14562 | 14563 | 14579 | 3500 | 5 | 151.9959 | 2.652  | 1.1884 | 2.0652 | 2.16  | 10.54 | 0.02 |
| 25 | 14560 | 14561 | 14580 | 4000 | 5 | 151.9959 | 1.835  | 1.1894 | 2.0641 | 1.73  | 10.4  | 0.04 |
| 25 | 14558 | 14559 | 14581 | 4500 | 5 | 151.9959 | 1.214  | 1.1834 | 2.0741 | 2.16  | 8.01  | 0.17 |
| 25 | 14556 | 14557 | 14582 | 4870 | 5 | 151.9959 | 1.988  | 1.185  | 2.0487 | 2.59  | 7.27  | 0.13 |
| 25 | 14554 | 14555 | 14583 | 4950 | 5 | 151.9959 | 2.297  | 1.1963 | 2.0364 | 2.39  | 6.84  | 0.14 |
| 25 | 14552 |       | 14584 | 4990 | 5 | 151.9959 | 2.156  |        | 2.2    | 6.46  | 0.17  |      |



|    |       |       |       |     |          |          |        |        |        |       |       |      |
|----|-------|-------|-------|-----|----------|----------|--------|--------|--------|-------|-------|------|
| 26 | 14638 |       | 0     | 4   | 152      | 13.378   |        |        |        |       |       |      |
| 27 | 14639 |       | 0     | 3   | 152.0133 | 14.056   |        |        |        |       |       |      |
| 27 | 14663 | 14678 | 25    | 3   | 152.0133 | 16.079   |        | 26.29  | 62.7   | 0.06  |       |      |
| 27 | 14661 |       | 45    | 3   | 152.0133 | 15.962   |        |        |        |       |       |      |
| 27 | 14659 | 14679 | 60    | 3   | 152.0133 | 19.039   |        | 25.2   | 56.5   | 0.05  |       |      |
| 27 | 14657 |       | 80    | 3   | 152.0133 | 20.359   |        |        |        |       |       |      |
| 27 | 14655 | 14680 | 100   | 3   | 152.0133 | 18.455   |        | 19.05  | 32.76  | 0.04  |       |      |
| 27 | 14653 |       | 120   | 3   | 152.0133 | 17.932   |        |        |        |       |       |      |
| 27 | 14651 | 14681 | 160   | 3   | 152.0133 | 29.708   |        | 9.94   | 32.36  | 0.05  |       |      |
| 27 | 14649 |       | 200   | 3   | 152.0133 | 19.906   |        |        |        |       |       |      |
| 27 | 14647 | 14682 | 250   | 3   | 152.0133 | 18.449   |        | 6.73   | 27.21  | 0.04  |       |      |
| 27 | 14645 |       | 300   | 3   | 152.0133 | 19.088   |        |        |        |       |       |      |
| 27 | 14643 |       | 350   | 3   | 152.0133 | 18.356   |        |        |        |       |       |      |
| 27 | 14641 |       | 400   | 3   | 152.0133 | 17.619   |        |        |        |       |       |      |
| 27 | 14766 |       | 400   | 3   | 152.0133 | 18.327   |        |        |        |       |       |      |
| 27 | 14764 |       | 450   | 3   | 152.0133 | 18.344   |        |        |        |       |       |      |
| 27 | 14762 | 14683 | 500   | 3   | 152.0133 | 18.766   |        | 6.06   | 27.96  | 0.08  |       |      |
| 27 | 14760 |       | 600   | 3   | 152.0133 | 17.362   |        |        |        |       |       |      |
| 27 | 14758 |       | 700   | 3   | 152.0133 | 13.272   |        |        |        |       |       |      |
| 27 | 14756 | 14684 | 800   | 3   | 152.0133 | 11.477   |        | 4.81   | 20.81  | 0.13  |       |      |
| 27 | 14754 |       | 900   | 3   | 152.0133 | 9.853    |        |        |        |       |       |      |
| 27 | 14752 |       | 1000  | 3   | 152.0133 | 9.203    |        |        |        |       |       |      |
| 27 | 14750 |       | 1200  | 3   | 152.0133 | 8.314    |        |        |        |       |       |      |
| 27 | 14748 | 14685 | 1400  | 3   | 152.0133 | 7.765    |        | 5.27   | 27.42  |       |       |      |
| 27 | 14746 |       | 1600  | 3   | 152.0133 | 6.178    |        |        |        |       |       |      |
| 27 | 14744 |       | 1800  | 3   | 152.0133 | 5.618    |        |        |        |       |       |      |
| 27 | 14721 |       | 1800  | 3   | 152.0133 | 4.899    |        |        |        |       |       |      |
| 27 | 14719 | 14724 | 2000  | 3   | 152.0133 | 4.352    |        | 4.16   | 21.14  | 0     |       |      |
| 27 | 14717 |       | 2200  | 3   | 152.0133 | 3.491    |        |        |        |       |       |      |
| 27 | 14715 | 14725 | 2400  | 3   | 152.0133 | 1.936    |        | 3.51   | 21.64  | 0.05  |       |      |
| 27 | 14713 |       | 2600  | 3   | 152.0133 | 2.526    |        |        |        |       |       |      |
| 27 | 14711 | 14726 | 2800  | 3   | 152.0133 | 2.298    |        | 3.39   | 22.25  | 0.04  |       |      |
| 27 | 14709 |       | 3000  | 3   | 152.0133 | 1.872    |        |        |        |       |       |      |
| 27 | 14707 | 14727 | 3400  | 3   | 152.0133 | 1.872    |        | 2.88   | 20.21  | 0.04  |       |      |
| 27 | 14705 | 14728 | 3900  | 3   | 152.0133 | 1.842    |        | 3.18   | 20.58  | 0.03  |       |      |
| 27 | 14703 | 14729 | 4405  | 3   | 152.0133 | 2.093    |        | 3.51   | 14.69  | 0.08  |       |      |
| 27 | 14701 | 14730 | 4485  | 3   | 152.0133 | 2.163    |        | 29.73  | 19.81  | 0.13  |       |      |
| 27 | 14699 | 14731 | 4525  | 3   | 152.0133 | 1.741    |        | 5.71   | 19.19  | 0.09  |       |      |
| 28 | 14785 |       | 0     | 1   | 152.0002 | 14.5     |        |        |        |       |       |      |
| 29 | 14786 |       | 0     | 0   | 151.9956 | 16.432   |        |        |        |       |       |      |
| 29 | 14830 | 14831 | 14789 | 25  | 0        | 151.9956 | 17.858 | 1.1535 | 2.111  | 39.76 | 84.66 | 0.2  |
| 29 | 14827 | 14828 |       | 50  | 0        | 151.9956 | 17.137 | 1.163  | 2.1051 |       |       |      |
| 29 | 14824 | 14825 | 14790 | 75  | 0        | 151.9956 | 17.391 | 1.1685 | 2.093  | 30.03 | 87.6  | 0.23 |
| 29 | 14821 | 14822 |       | 90  | 0        | 151.9956 | 18.09  | 1.1637 | 2.1067 |       |       |      |
| 29 | 14818 | 14819 | 14791 | 115 | 0        | 151.9956 | 16.915 | 1.1676 | 2.0841 | 14.68 | 64.47 | 0.17 |
| 29 | 14815 | 14816 | 14792 | 130 | 0        | 151.9956 | 17.241 | 1.1627 | 2.1069 |       | 54.35 | 0.22 |
| 29 | 14812 | 14813 | 14793 | 155 | 0        | 151.9956 | 15.147 | 1.1655 | 2.0971 | 10.13 | 40.49 | 0.31 |

|    |       |       |       |      |    |          |        |        |        |       |       |      |
|----|-------|-------|-------|------|----|----------|--------|--------|--------|-------|-------|------|
| 29 | 14809 | 14810 |       | 175  | 0  | 151.9956 | 14.507 | 1.1642 | 2.1032 |       |       |      |
| 29 | 14957 | 14958 | 14794 | 200  | 0  | 151.9956 | 15.918 | 1.1652 | 2.0991 | 9.29  | 43.79 | 0.46 |
| 29 | 14954 |       | 14795 | 250  | 0  | 151.9956 | 15.354 |        |        | 9.06  | 41.99 | 0.42 |
| 29 | 14951 | 14952 |       | 300  | 0  | 151.9956 | 19.607 | 1.1612 | 2.1071 |       |       |      |
| 29 | 14948 | 14949 | 14796 | 350  | 0  | 151.9956 | 18.926 | 1.1668 | 2.0859 | 9.81  | 44.21 | 0.17 |
| 29 | 14945 | 14946 | 14883 | 400  | 0  | 151.9956 | 19.329 | 1.162  | 2.1025 | 11.68 | 60.32 | 0.17 |
| 29 | 14942 |       | 14884 | 500  | 0  | 151.9956 | 19.178 |        |        | 9.52  | 46.03 | 0.16 |
| 29 | 14939 | 14940 | 14885 | 600  | 0  | 151.9956 | 18.789 | 1.1712 | 2.0869 | 7.33  | 39.09 | 0.1  |
| 29 | 14936 | 14937 | 14886 | 700  | 0  | 151.9956 | 14.943 | 1.1643 | 2.1    | 6.31  | 29.67 | 0.12 |
| 29 | 14912 | 14913 | 14887 | 800  | 0  | 151.9956 | 11.349 | 1.1758 | 2.081  | 5.96  | 29.05 | 0.16 |
| 29 | 14909 | 14910 | 14888 | 1000 | 0  | 151.9956 | 10.385 | 1.1613 | 2.0937 | 5.38  | 25.01 | 0.11 |
| 29 | 14906 | 14907 | 14889 | 1200 | 0  | 151.9956 | 9.398  | 1.1717 | 2.0883 | 5.59  | 28.63 | 0.09 |
| 29 | 14903 | 14904 | 14890 | 1400 | 0  | 151.9956 | 6.931  | 1.1661 | 2.0985 | 5.67  | 27.96 | 0    |
| 29 | 14900 | 14901 |       | 1600 | 0  | 151.9956 | 7.196  | 1.175  | 2.0841 |       |       |      |
| 29 | 14897 | 14898 | 14916 | 1800 | 0  | 151.9956 | 6.134  | 1.1679 | 2.0929 | 5.22  | 26.81 | 0.07 |
| 29 | 14894 | 14895 |       | 2000 | 0  | 151.9956 | 4.923  | 1.1628 | 2.0951 |       |       |      |
| 29 | 14891 |       | 14917 | 2200 | 0  | 151.9956 | 5.108  |        |        | 5.2   | 28.78 | 0.05 |
| 29 | 14854 | 14855 |       | 2500 | 0  | 151.9956 | 2.969  | 1.1735 | 2.0883 |       |       |      |
| 29 | 14851 | 14852 | 14918 | 2800 | 0  | 151.9956 | 2.939  | 1.1724 | 2.086  | 4.41  | 25.2  | 0.12 |
| 29 | 14848 | 14849 |       | 3200 | 0  | 151.9956 | 2.761  | 1.1674 | 2.0899 |       |       |      |
| 29 | 14845 | 14846 | 14919 | 3600 | 0  | 151.9956 | 3.995  | 1.1664 | 2.0931 | 3.85  | 22.9  | 0.05 |
| 29 | 14842 |       | 14920 | 4000 | 0  | 151.9956 | 1.996  |        |        | 4.31  | 31.43 | 0.1  |
| 29 | 14839 | 14840 | 14921 | 4215 | 0  | 151.9956 | 2.979  | 1.1635 | 2.0933 | 5.7   | 37.27 | 0.11 |
| 29 | 14836 | 14837 | 14922 | 4295 | 0  | 151.9956 | 2.264  | 1.173  | 2.0892 | 5.04  | 37.44 | 0.09 |
| 29 | 14833 |       | 14923 | 4335 | 0  | 151.9956 | 2.861  |        |        | 4.97  | 36.34 | 0.09 |
| 30 | 14960 |       |       | 0    | -1 | 152      | 14.988 |        |        |       |       |      |
| 31 | 14975 |       |       | 0    | -3 | 152.0002 | 15.315 |        |        |       |       |      |
| 31 | 14999 |       | 14967 | 30   | -3 | 152.0002 | 18.99  |        |        | 30.82 | 59.36 | 0.29 |
| 31 | 14997 |       |       | 65   | -3 | 152.0002 | 19.15  |        |        |       |       |      |
| 31 | 14995 |       | 14968 | 85   | -3 | 152.0002 | 18.379 |        |        | 25.09 | 68.45 | 0.36 |
| 31 | 14993 |       |       | 105  | -3 | 152.0002 | 17.034 |        |        |       |       |      |
| 31 | 14991 |       |       | 130  | -3 | 152.0002 | 14.639 |        |        |       |       |      |
| 31 | 14989 |       | 14969 | 150  | -3 | 152.0002 | 13.697 |        |        | 12.13 | 39.43 | 0.12 |
| 31 | 14987 |       |       | 180  | -3 | 152.0002 | 18.408 |        |        |       |       |      |
| 31 | 14985 |       |       | 210  | -3 | 152.0002 | 19.725 |        |        |       |       |      |
| 31 | 14983 |       | 14970 | 260  | -3 | 152.0002 | 21.986 |        |        | 6.28  | 19.81 | 0.06 |
| 31 | 14981 |       |       | 300  | -3 | 152.0002 | 24.784 |        |        |       |       |      |
| 31 | 14979 |       |       | 340  | -3 | 152.0002 | 21.667 |        |        |       |       |      |
| 31 | 14977 |       | 14971 | 400  | -3 | 152.0002 | 21.41  |        |        | 9.92  | 23.67 | 0.1  |
| 31 | 15093 |       |       | 400  | -3 | 152.0002 | 19.262 |        |        |       |       |      |
| 31 | 15091 |       |       | 450  | -3 | 152.0002 | 17.961 |        |        |       |       |      |
| 31 | 15089 |       |       | 500  | -3 | 152.0002 | 17.25  |        |        |       |       |      |
| 31 | 15087 |       | 14972 | 600  | -3 | 152.0002 | 13.749 |        |        | 4.78  | 20.72 | 0.05 |
| 31 | 15085 |       |       | 700  | -3 | 152.0002 | 13.892 |        |        |       |       |      |
| 31 | 15083 |       |       | 800  | -3 | 152.0002 | 13.585 |        |        |       |       |      |
| 31 | 15081 |       | 14973 | 900  | -3 | 152.0002 | 12.369 |        |        | 3.96  | 17.63 | 0.08 |
| 31 | 15079 |       |       | 1000 | -3 | 152.0002 | 10.691 |        |        |       |       |      |

|    |       |       |       |      |          |          |        |        |        |       |       |      |
|----|-------|-------|-------|------|----------|----------|--------|--------|--------|-------|-------|------|
| 31 | 15077 |       | 1200  | -3   | 152.0002 | 16.121   |        |        |        |       |       |      |
| 31 | 15075 | 14974 | 1400  | -3   | 152.0002 | 9.974    |        | 3.68   | 19.74  | 0.03  |       |      |
| 31 | 15073 |       | 1600  | -3   | 152.0002 | 5.951    |        |        |        |       |       |      |
| 31 | 15071 |       | 1800  | -3   | 152.0002 | 5.423    |        |        |        |       |       |      |
| 31 | 15035 |       | 1800  | -3   | 152.0002 | 6.195    |        |        |        |       |       |      |
| 31 | 15033 | 15063 | 2000  | -3   | 152.0002 | 5.019    |        | 3.68   | 19.76  | 0.08  |       |      |
| 31 | 15031 |       | 2250  | -3   | 152.0002 | 4.327    |        |        |        |       |       |      |
| 31 | 15029 | 15064 | 2500  | -3   | 152.0002 | 4.489    |        | 2.72   | 15.13  | 0.04  |       |      |
| 31 | 15027 |       | 2750  | -3   | 152.0002 | 3.415    |        |        |        |       |       |      |
| 31 | 15025 | 15065 | 3000  | -3   | 152.0002 | 2.821    |        | 2.79   | 14.11  | 0.05  |       |      |
| 31 | 15023 |       | 3400  | -3   | 152.0002 | 2.496    |        |        |        |       |       |      |
| 31 | 15021 | 15066 | 3800  | -3   | 152.0002 | 2.364    |        | 2.31   | 14.64  | 0.05  |       |      |
| 31 | 15019 | 15067 | 4200  | -3   | 152.0002 | 2.074    |        | 2.42   | 15.45  | 0.08  |       |      |
| 31 | 15017 | 15068 | 4470  | -3   | 152.0002 | 1.953    |        | 2.55   | 13.48  | 0.13  |       |      |
| 31 | 15015 | 15069 | 4550  | -3   | 152.0002 | 2.083    |        | 2.43   | 16.04  | 0.12  |       |      |
| 31 | 15013 | 15070 | 4590  | -3   | 152.0002 | 2        |        | 1.78   | 13.8   |       |       |      |
| 32 | 15107 |       | 0     | -4   | 152      | 14.205   |        |        |        |       |       |      |
| 33 | 15108 |       | 0     | -5   | 152.0006 | 15.385   |        |        |        |       |       |      |
| 33 | 15153 | 15154 | 15123 | 25   | -5       | 152.0006 | 17.264 | 1.1691 | 2.091  | 32.33 | 61.55 | 0.28 |
| 33 | 15151 | 15152 |       | 65   | -5       | 152.0006 | 17.71  | 1.1696 | 2.0918 |       |       |      |
| 33 | 15149 | 15150 | 15124 | 80   | -5       | 152.0006 | 17.341 | 1.1685 | 2.0936 | 35.1  | 95.89 | 0.42 |
| 33 | 15147 | 15148 |       | 100  | -5       | 152.0006 | 16.098 | 1.1687 | 2.0936 |       |       |      |
| 33 | 15145 | 15146 | 15125 | 125  | -5       | 152.0006 | 17.585 | 1.1667 | 2.0977 | 17.83 | 41.18 | 0.2  |
| 33 | 15143 | 15144 |       | 150  | -5       | 152.0006 | 14.294 | 1.1677 | 2.0956 |       |       |      |
| 33 | 15141 | 15142 | 15126 | 175  | -5       | 152.0006 | 16.507 | 1.1695 | 2.0901 | 8.92  | 45.69 | 0.14 |
| 33 | 15139 | 15140 |       | 200  | -5       | 152.0006 | 16.299 | 1.1674 | 2.0944 |       |       |      |
| 33 | 15137 | 15138 | 15127 | 250  | -5       | 152.0006 | 19.554 | 1.1665 | 2.094  | 5.97  | 22.53 | 0.07 |
| 33 | 15135 |       |       | 300  | -5       | 152.0006 | 16.782 |        |        |       |       |      |
| 33 | 15133 | 15134 |       | 350  | -5       | 152.0006 | 15.428 | 1.164  | 2.0936 |       |       |      |
| 33 | 15131 |       | 15128 | 400  | -5       | 152.0006 | 20.918 |        |        | 6.47  | 32.04 | 0.1  |
| 33 | 15239 | 15240 |       | 400  | -5       | 152.0006 | 18.831 | 1.1661 | 2.0913 |       |       |      |
| 33 | 15237 |       |       | 450  | -5       | 152.0006 | 17.301 |        |        |       |       |      |
| 33 | 15235 | 15236 |       | 500  | -5       | 152.0006 | 14.657 | 1.1666 | 2.0908 |       |       |      |
| 33 | 15233 | 15234 | 15129 | 600  | -5       | 152.0006 | 14.014 | 1.1648 | 2.0973 | 4.15  | 22.53 | 0.1  |
| 33 | 15231 | 15232 |       | 700  | -5       | 152.0006 | 12.171 | 1.1654 | 2.0933 |       |       |      |
| 33 | 15229 | 15230 |       | 800  | -5       | 152.0006 | 10.109 | 1.1615 | 2.0956 |       |       |      |
| 33 | 15227 | 15228 | 15130 | 900  | -5       | 152.0006 | 9.006  | 1.1664 | 2.0905 | 2.95  | 16.2  | 0.04 |
| 33 | 15225 | 15226 |       | 1000 | -5       | 152.0006 | 12.939 | 1.1669 | 2.0872 |       |       |      |
| 33 | 15223 | 15224 |       | 1200 | -5       | 152.0006 | 6.151  | 1.1709 | 2.089  |       |       |      |
| 33 | 15221 | 15222 | 15209 | 1400 | -5       | 152.0006 | 5.038  | 1.1751 | 2.0837 | 3.38  | 17.09 | 0.11 |
| 33 | 15219 | 15220 |       | 1600 | -5       | 152.0006 | 5.308  | 1.1798 | 2.0768 |       |       |      |
| 33 | 15217 | 15218 |       | 1800 | -5       | 152.0006 | 4.716  | 1.1772 | 2.0818 |       |       |      |
| 33 | 15181 | 15182 |       | 1800 | -5       | 152.0006 | 4.892  | 1.181  | 2.0772 |       |       |      |
| 33 | 15179 | 15180 | 15210 | 2000 | -5       | 152.0006 | 5.958  | 1.1822 | 2.0749 | 3.36  | 17.14 | 0.05 |
| 33 | 15177 | 15178 |       | 2250 | -5       | 152.0006 | 3.384  | 1.1709 | 2.0887 |       |       |      |
| 33 | 15175 | 15176 | 15211 | 2500 | -5       | 152.0006 | 3.003  | 1.1761 | 2.0794 | 2.79  | 13.65 | 0.04 |
| 33 | 15173 | 15174 |       | 2750 | -5       | 152.0006 | 2.021  | 1.1651 | 2.0924 |       |       |      |

|      |       |       |       |      |     |          |        |        |        |       |       |      |
|------|-------|-------|-------|------|-----|----------|--------|--------|--------|-------|-------|------|
| 33   | 15171 |       |       | 3000 | -5  | 152.0006 | 2.929  |        |        |       |       |      |
| 33   | 15169 |       | 15212 | 3500 | -5  | 152.0006 | 2.149  |        |        | 2.54  | 12.53 | 0.03 |
| 33   | 15167 |       | 15213 | 4000 | -5  | 152.0006 | 1.269  |        |        | 1.79  | 10.75 | 0.06 |
| 33   | 15165 |       | 15214 | 4500 | -5  | 152.0006 | 1.648  |        |        | 2.17  | 11.68 | 0.17 |
| 33   | 15163 | 15164 | 15215 | 5175 | -5  | 152.0006 | 2.393  | 1.1908 | 2.0601 | 2.36  | 6.8   | 0.28 |
| 33   | 15161 | 15162 |       | 5255 | -5  | 152.0006 | 2.313  | 1.1812 | 2.0691 |       |       |      |
| 33   | 15159 | 15160 | 15216 | 5295 | -5  | 152.0006 | 2.421  | 1.1741 | 2.0817 | 1.81  | 6.54  | 0.16 |
| 33.5 | 15253 |       |       | 0    | -6  | 152      | 13.901 |        |        |       |       |      |
| 34   | 15267 |       |       | 0    | -8  | 152.0002 | 14.993 |        |        |       |       |      |
| 34   | 15290 |       |       | 25   | -8  | 152.0002 | 16.788 |        |        |       |       |      |
| 34   | 15288 |       |       | 65   | -8  | 152.0002 | 16.106 |        |        |       |       |      |
| 34   | 15286 |       |       | 80   | -8  | 152.0002 | 15.523 |        |        |       |       |      |
| 34   | 15284 |       |       | 110  | -8  | 152.0002 | 17.198 |        |        |       |       |      |
| 34   | 15282 |       |       | 145  | -8  | 152.0002 | 15.207 |        |        |       |       |      |
| 34   | 15280 |       |       | 200  | -8  | 152.0002 | 13.487 |        |        |       |       |      |
| 34   | 15278 |       |       | 260  | -8  | 152.0002 | 18.829 |        |        |       |       |      |
| 34   | 15276 |       |       | 320  | -8  | 152.0002 | 19.026 |        |        |       |       |      |
| 34   | 15274 |       |       | 480  | -8  | 152.0002 | 15.398 |        |        |       |       |      |
| 34   | 15272 |       |       | 600  | -8  | 152.0002 | 15.033 |        |        |       |       |      |
| 34   | 15270 |       |       | 800  | -8  | 152.0002 | 11.022 |        |        |       |       |      |
| 34   | 15268 |       |       | 1000 | -8  | 152.0002 | 8.721  |        |        |       |       |      |
| 34.5 | 15313 |       |       | 0    | -9  | 152      | 12.843 |        |        |       |       |      |
| 35   | 15319 |       |       | 0    | -11 | 152.0002 | 14.031 |        |        |       |       |      |
| 35   | 15342 | 15343 | 15293 | 25   | -11 | 152.0002 | 16.236 | 1.1705 | 2.0912 | 32.64 | 45.23 | 0.25 |
| 35   | 15339 | 15340 |       | 50   | -11 | 152.0002 | 15.372 | 1.1683 | 2.0952 |       |       |      |
| 35   | 15336 | 15337 | 15294 | 75   | -11 | 152.0002 | 15.42  | 1.1699 | 2.0918 | 22.05 | 40.29 | 0.31 |
| 35   | 15333 | 15334 | 15295 | 100  | -11 | 152.0002 | 19.766 | 1.1709 | 2.0898 | 16.15 | 29.35 | 0.21 |
| 35   | 15330 | 15331 |       | 125  | -11 | 152.0002 | 15.174 | 1.1703 | 2.0916 |       |       |      |
| 35   | 15327 | 15328 | 15296 | 150  | -11 | 152.0002 | 16.568 | 1.17   | 2.0908 | 12.07 | 60.85 | 0.13 |
| 35   | 15324 | 15325 | 15297 | 225  | -11 | 152.0002 | 13.501 | 1.1705 | 2.0878 | 7.32  | 40.55 | 0.1  |
| 35   | 15321 | 15322 |       | 300  | -11 | 152.0002 | 13.602 | 1.1647 | 2.0944 |       |       |      |
| 35   | 15457 | 15458 | 15298 | 350  | -11 | 152.0002 | 13.422 | 1.1647 | 2.0943 | 6.66  | 38.66 | 0.15 |
| 35   | 15454 | 15455 |       | 450  | -11 | 152.0002 | 12.202 | 1.1612 | 2.0987 |       |       |      |
| 35   | 15451 |       | 15299 | 550  | -11 | 152.0002 | 12.161 |        |        | 5.27  | 32.18 | 0.18 |
| 35   | 15448 | 15449 | 15300 | 800  | -11 | 152.0002 | 9.097  | 1.1642 | 2.0961 | 3.67  | 22.3  |      |
| 35   | 15445 | 15446 |       | 1000 | -11 | 152.0002 | 7.529  | 1.1691 | 2.0903 |       |       |      |
| 35   | 15442 | 15443 |       | 1200 | -11 | 152.0002 | 6.559  | 1.1711 | 2.0888 |       |       |      |
| 35   | 15439 | 15440 | 15347 | 1400 | -11 | 152.0002 | 5.408  | 1.1748 | 2.0859 | 2.44  | 14.47 | 0.1  |
| 35   | 15436 | 15437 |       | 1600 | -11 | 152.0002 | 4.73   | 1.1781 | 2.0791 |       |       |      |
| 35   | 15433 | 15434 |       | 1800 | -11 | 152.0002 | 4.129  | 1.1819 | 2.0749 |       |       |      |
| 35   | 15430 | 15431 | 15348 | 2000 | -11 | 152.0002 | 2.377  | 1.1773 | 2.0846 | 2.26  | 12.3  | 0.1  |
| 35   | 15427 |       | 15349 | 2200 | -11 | 152.0002 | 2.199  |        |        | 1.73  | 10.15 | 0.09 |
| 35   | 15424 | 15425 | 15350 | 2400 | -11 | 152.0002 | 2.11   | 1.1831 | 2.0722 | 1.91  | 10.24 | 0.08 |
| 35   | 15421 | 15422 | 15351 | 2600 | -11 | 152.0002 | 1.326  | 1.1759 | 2.0803 | 1.71  | 9.51  | 0.12 |
| 35   | 15418 | 15419 | 15352 | 2800 | -11 | 152.0002 | 2.035  | 1.1843 | 2.069  | 1.49  | 9.34  | 0.12 |
| 35   | 15415 |       | 15353 | 3000 | -11 | 152.0002 | 2.428  |        |        | 1.58  | 9.06  | 0.07 |
| 35   | 15375 | 15376 | 15404 | 3200 | -11 | 152.0002 | 2.291  | 1.1902 | 2.0609 | 1.32  | 9.25  | 0.07 |

|      |       |       |       |      |     |          |        |        |        |       |       |      |
|------|-------|-------|-------|------|-----|----------|--------|--------|--------|-------|-------|------|
| 35   | 15412 |       |       | 3400 | -11 | 152.0002 | 1.964  |        |        |       |       |      |
| 35   | 15372 | 15373 | 15405 | 3600 | -11 | 152.0002 | 2.08   | 1.1859 | 2.069  | 1.66  | 7.6   | 0.04 |
| 35   | 15369 | 15370 | 15406 | 4000 | -11 | 152.0002 | 1.53   | 1.1932 | 2.077  | 1.14  | 7.27  | 0.05 |
| 35   | 15366 | 15367 | 15407 | 4500 | -11 | 152.0002 | 1.426  | 1.1854 | 2.0735 | 0.86  | 10.51 | 0.13 |
| 35   | 15363 | 15364 | 15408 | 4750 | -11 | 152.0002 | 2.414  | 1.1886 | 2.0656 | 0.78  | 6.84  | 0.23 |
| 35   | 15360 | 15361 | 15409 | 4970 | -11 | 152.0002 | 1.857  | 1.187  | 2.0704 | 1.38  | 5.44  | 0.16 |
| 35   | 15357 | 15358 | 15410 | 5050 | -11 | 152.0002 | 1.856  | 1.1925 | 2.0606 | 0.76  | 5.39  | 0.18 |
| 35   | 15354 | 15355 | 15411 | 5090 | -11 | 152.0002 | 2.433  | 1.1857 | 2.0714 | 0.86  | 5.88  | 0.17 |
| 35.5 | 15472 |       |       | 0    | -12 | 152      | 13.443 |        |        |       |       |      |
| 36   | 15473 |       |       | 0    | -13 | 152.0001 | 15.369 |        |        |       |       |      |
| 36   | 15509 |       |       | 25   | -13 | 152.0001 | 19.367 |        |        |       |       |      |
| 36   | 15507 |       |       | 60   | -13 | 152.0001 | 15.814 |        |        |       |       |      |
| 36   | 15505 |       |       | 110  | -13 | 152.0001 | 17.521 |        |        |       |       |      |
| 36   | 15503 |       |       | 150  | -13 | 152.0001 | 15.53  |        |        |       |       |      |
| 36   | 15501 |       |       | 200  | -13 | 152.0001 | 14.72  |        |        |       |       |      |
| 36   | 15499 |       |       | 250  | -13 | 152.0001 | 13.296 |        |        |       |       |      |
| 36   | 15497 |       |       | 350  | -13 | 152.0001 | 15.05  |        |        |       |       |      |
| 36   | 15495 |       |       | 400  | -13 | 152.0001 | 13.699 |        |        |       |       |      |
| 36   | 15493 |       |       | 500  | -13 | 152.0001 | 13.134 |        |        |       |       |      |
| 36   | 15491 |       |       | 650  | -13 | 152.0001 | 10.225 |        |        |       |       |      |
| 36   | 15489 |       |       | 800  | -13 | 152.0001 | 8.198  |        |        |       |       |      |
| 36   | 15487 |       |       | 1000 | -13 | 152.0001 | 6.8    |        |        |       |       |      |
| 37   | 15544 |       |       | 0    | -15 | 152.0002 | 14.411 |        |        |       |       |      |
| 37   | 15542 |       | 15512 | 25   | -15 | 152.0002 | 15.158 |        |        | 21.16 | 38.07 | 0.16 |
| 37   | 15540 |       | 15513 | 60   | -15 | 152.0002 | 14.619 |        |        | 20.69 | 39.36 | 0.17 |
| 37   | 15538 |       |       | 100  | -15 | 152.0002 | 14.153 |        |        |       |       |      |
| 37   | 15536 |       | 15514 | 135  | -15 | 152.0002 | 16.407 |        |        | 16.04 | 46.8  | 0    |
| 37   | 15534 |       |       | 150  | -15 | 152.0002 | 13.638 |        |        |       |       |      |
| 37   | 15532 |       |       | 180  | -15 | 152.0002 | 13.021 |        |        |       |       |      |
| 37   | 15530 |       |       | 200  | -15 | 152.0002 | 13.33  |        |        |       |       |      |
| 37   | 15528 |       | 15515 | 250  | -15 | 152.0002 | 12.719 |        |        | 6     | 45.41 | 0.13 |
| 37   | 15526 |       |       | 300  | -15 | 152.0002 | 13.412 |        |        |       |       |      |
| 37   | 15524 |       |       | 350  | -15 | 152.0002 | 12.787 |        |        |       |       |      |
| 37   | 15522 |       |       | 400  | -15 | 152.0002 | 14.072 |        |        |       |       |      |
| 37   | 15520 |       | 15516 | 450  | -15 | 152.0002 | 14.005 |        |        | 4.81  | 33.14 | 0.16 |
| 37   | 15638 |       |       | 450  | -15 | 152.0002 | 14.113 |        |        |       |       |      |
| 37   | 15636 |       |       | 500  | -15 | 152.0002 | 11.835 |        |        |       |       |      |
| 37   | 15634 |       |       | 575  | -15 | 152.0002 | 11.918 |        |        |       |       |      |
| 37   | 15632 |       |       | 650  | -15 | 152.0002 | 10.391 |        |        |       |       |      |
| 37   | 15630 |       |       | 725  | -15 | 152.0002 | 7.836  |        |        |       |       |      |
| 37   | 15628 |       |       | 800  | -15 | 152.0002 | 6.972  |        |        |       |       |      |
| 37   | 15626 |       | 15517 | 900  | -15 | 152.0002 | 8.444  |        |        | 3.18  | 24.57 | 0.25 |
| 37   | 15624 |       |       | 1000 | -15 | 152.0002 | 7.105  |        |        |       |       |      |
| 37   | 15622 |       | 15518 | 1200 | -15 | 152.0002 | 5.861  |        |        | 3.54  | 26.66 | 0    |
| 37   | 15620 |       |       | 1400 | -15 | 152.0002 | 5.788  |        |        |       |       |      |
| 37   | 15618 |       |       | 1600 | -15 | 152.0002 | 4.042  |        |        |       |       |      |
| 37   | 15616 |       | 15519 | 1800 | -15 | 152.0002 | 3.223  |        |        | 2     | 16.97 | 0.11 |

|      |       |       |       |     |          |          |        |        |        |       |       |      |
|------|-------|-------|-------|-----|----------|----------|--------|--------|--------|-------|-------|------|
| 37   | 15580 |       | 1800  | -15 | 152.0002 | 3.929    |        |        |        |       |       |      |
| 37   | 15578 |       | 2100  | -15 | 152.0002 | 2.836    |        |        |        |       |       |      |
| 37   | 15576 | 15608 | 2400  | -15 | 152.0002 | 1.765    |        | 1.41   | 9.98   |       | 0.08  |      |
| 37   | 15574 | 15609 | 2600  | -15 | 152.0002 | 2.185    |        | 1.01   | 8.74   |       | 0.07  |      |
| 37   | 15572 | 15610 | 2800  | -15 | 152.0002 | 1.535    |        | 1.1    | 9.34   |       | 0.09  |      |
| 37   | 15570 | 15611 | 3080  | -15 | 152.0002 | 1.888    |        | 0.97   | 8.02   |       | 0.06  |      |
| 37   | 15568 | 15612 | 3200  | -15 | 152.0002 | 2.473    |        | 1.01   | 7.68   |       | 0.05  |      |
| 37   | 15566 | 15613 | 3700  | -15 | 152.0002 | 1.472    |        |        |        |       |       |      |
| 37   | 15564 |       | 4200  | -15 | 152.0002 | 2.217    |        |        |        |       |       |      |
| 37   | 15562 | 15614 | 4620  | -15 | 152.0002 | 1.803    |        | 1.01   | 5.16   |       | 0.26  |      |
| 37   | 15560 |       | 4700  | -15 | 152.0002 | 2.801    |        |        |        |       |       |      |
| 37   | 15558 | 15615 | 4740  | -15 | 152.0002 | 1.529    |        |        | 5.55   |       | 0.23  |      |
| 37.5 | 15656 |       | 0     | -16 | 152      | 13.699   |        |        |        |       |       |      |
| 38   | 15657 |       | 0     | -18 | 152.0005 | 15.934   |        |        |        |       |       |      |
| 38   | 15693 |       | 25    | -18 | 152.0005 | 15.316   |        |        |        |       |       |      |
| 38   | 15691 |       | 55    | -18 | 152.0005 | 14.932   |        |        |        |       |       |      |
| 38   | 15689 |       | 90    | -18 | 152.0005 | 13.937   |        |        |        |       |       |      |
| 38   | 15687 |       | 125   | -18 | 152.0005 | 15.875   |        |        |        |       |       |      |
| 38   | 15685 |       | 150   | -18 | 152.0005 | 13.468   |        |        |        |       |       |      |
| 38   | 15683 |       | 250   | -18 | 152.0005 | 13.877   |        |        |        |       |       |      |
| 38   | 15681 |       | 325   | -18 | 152.0005 | 13.53    |        |        |        |       |       |      |
| 38   | 15679 |       | 425   | -18 | 152.0005 | 14.066   |        |        |        |       |       |      |
| 38   | 15677 |       | 500   | -18 | 152.0005 | 12.214   |        |        |        |       |       |      |
| 38   | 15675 |       | 650   | -18 | 152.0005 | 11.704   |        |        |        |       |       |      |
| 38   | 15673 |       | 800   | -18 | 152.0005 | 9.057    |        |        |        |       |       |      |
| 38   | 15671 |       | 1000  | -18 | 152.0005 | 8.316    |        |        |        |       |       |      |
| 38.5 | 15704 |       | 0     | -19 | 152      | 12.42    |        |        |        |       |       |      |
| 39   | 15705 |       | 0     | -20 | 152.0001 | 12.875   |        |        |        |       |       |      |
| 39   | 15741 | 15742 | 15696 | 25  | -20      | 152.0001 | 14.688 | 1.1714 | 2.0892 | 19.27 | 23.72 | 0.11 |
| 39   | 15739 | 15740 | 15697 | 45  | -20      | 152.0001 | 15.7   | 1.1706 | 2.0899 | 18.2  | 23.77 | 0.12 |
| 39   | 15737 | 15738 |       | 90  | -20      | 152.0001 | 12.701 | 1.1681 | 2.0938 |       |       |      |
| 39   | 15735 | 15736 | 15698 | 120 | -20      | 152.0001 | 13.754 | 1.1691 | 2.0914 | 14.81 | 34.96 | 0.1  |
| 39   | 15733 | 15734 | 15699 | 150 | -20      | 152.0001 | 11.578 | 1.1665 | 2.0954 | 12.48 | 27.23 | 0.11 |
| 39   | 15731 | 15732 | 15700 | 200 | -20      | 152.0001 | 18.605 | 1.1645 | 2.0954 | 10.28 | 53.33 | 0.1  |
| 39   | 15729 | 15730 |       | 250 | -20      | 152.0001 | 13.219 | 1.1666 | 2.0907 |       |       |      |
| 39   | 15727 | 15728 | 15701 | 300 | -20      | 152.0001 | 11.855 | 1.1629 | 2.0941 | 5.1   | 31.72 | 0.14 |
| 39   | 15725 | 15726 |       | 350 | -20      | 152.0001 | 13.869 | 1.1625 | 2.0933 |       |       |      |
| 39   | 15723 | 15724 | 15702 | 400 | -20      | 152.0001 | 11.865 | 1.1562 | 2.1001 | 4.62  | 24.9  | 0.07 |
| 39   | 15721 | 15722 |       | 450 | -20      | 152.0001 | 13.908 | 1.1537 | 2.1024 |       |       |      |
| 39   | 15719 | 15720 | 15703 | 500 | -20      | 152.0001 | 13.085 | 1.1522 | 2.1046 |       | 24.76 |      |
| 39   | 15836 | 15837 | 15744 | 500 | -20      | 152.0001 | 12.493 | 1.151  | 2.1056 | 3.76  |       | 0    |
| 39   | 15834 | 15835 |       | 550 | -20      | 152.0001 | 13.246 | 1.1541 | 2.1021 |       |       |      |
| 39   | 15832 | 15833 | 15745 | 600 | -20      | 152.0001 | 12.823 | 1.1516 | 2.1061 | 3.46  | 22.21 | 0.28 |
| 39   | 15830 | 15831 |       | 650 | -20      | 152.0001 | 12.779 | 1.1523 | 2.1041 |       |       |      |
| 39   | 15828 | 15829 |       | 700 | -20      | 152.0001 | 10.975 | 1.1541 | 2.1029 |       |       |      |
| 39   | 15826 | 15827 | 15746 | 800 | -20      | 152.0001 | 9.586  | 1.1553 | 2.1033 | 2.5   | 17.88 | 0.16 |
| 39   | 15824 | 15825 |       | 900 | -20      | 152.0001 | 9      | 1.1624 | 2.0944 |       |       |      |

|    |       |       |       |      |     |          |       |        |        |      |       |      |
|----|-------|-------|-------|------|-----|----------|-------|--------|--------|------|-------|------|
| 39 | 15822 | 15823 | 15747 | 1000 | -20 | 152.0001 | 6.628 | 1.1613 | 2.0968 | 2.24 | 15.9  | 0.18 |
| 39 | 15820 |       |       | 1100 | -20 | 152.0001 | 6.068 |        |        |      |       |      |
| 39 | 15818 | 15819 | 15748 | 1200 | -20 | 152.0001 | 6.021 | 1.167  | 2.0912 | 1.39 | 15.45 | 0.13 |
| 39 | 15816 | 15817 | 15749 | 1400 | -20 | 152.0001 | 4.371 | 1.1694 | 2.0882 | 1.45 | 15.78 | 0.19 |
| 39 | 15814 | 15815 | 15750 | 1600 | -20 | 152.0001 | 3.817 | 1.1707 | 2.0871 | 1.36 | 14.05 | 0.11 |
| 39 | 15774 | 15775 | 15802 | 1600 | -20 | 152.0001 | 4.964 | 1.1771 | 2.077  |      | 14.82 | 0.12 |
| 39 | 15772 | 15773 | 15751 | 1800 | -20 | 152.0001 | 3.09  | 1.1749 | 2.082  | 1.01 | 11.04 | 0.16 |
| 39 | 15770 | 15771 |       | 2000 | -20 | 152.0001 | 2.892 | 1.1786 | 2.077  |      |       |      |
| 39 | 15768 | 15769 |       | 2200 | -20 | 152.0001 | 2.938 | 1.1799 | 2.074  |      |       |      |
| 39 | 15766 | 15767 | 15803 | 2400 | -20 | 152.0001 | 2.042 | 1.1833 | 2.0714 | 0.99 | 8.62  | 0.12 |
| 39 | 15764 | 15765 |       | 2600 | -20 | 152.0001 | 2.059 | 1.183  | 2.072  |      |       |      |
| 39 | 15762 | 15763 | 15804 | 3000 | -20 | 152.0001 | 3.142 | 1.1875 | 2.0656 | 0.63 | 7.1   | 0.07 |
| 39 | 15760 | 15761 | 15805 | 3400 | -20 | 152.0001 | 2.334 | 1.1875 | 2.0654 | 0.54 | 6.86  | 0.04 |
| 39 | 15758 | 15759 | 15806 | 3800 | -20 | 152.0001 | 2.338 | 1.1884 | 2.0638 | 0.46 | 5.92  | 0.06 |
| 39 | 15756 | 15757 | 15807 | 4060 | -20 | 152.0001 | 2.028 | 1.1915 | 2.059  | 0.41 | 5.05  | 0.11 |
| 39 | 15754 | 15755 | 15808 | 4140 | -20 | 152.0001 | 2.244 | 1.1895 | 2.0622 | 0.43 | 5.08  | 0.11 |
| 39 | 15752 |       | 15809 | 4180 | -20 | 152.0001 | 1.335 |        |        | 0.63 | 5.05  |      |

\* GT# represents GEOTRACES sample number.
